# Supplementary material for: Characterization of a Bbotybirnavirus Conferring Hypovirulence in the Pear Stem Wart Disease Phytopathogenic Fungus <em>Botryosphaeria dothidea</em>
Source: Preprints.org preprint supplement (doi:10.20944/preprints201902.0035.v1), 2019-02-04
Supplement: Supplementary file 1 [file supplementary]

**Supplementary**

**Figure S2.** Multiple-sequence alignments of the dsRNA2 segment of BdBRV1, BmBRV1 and SsBRV1. Abbreviations: BdBRV1, Botryosphaeria dothidea botybirnavirus 1; BmBRV1, Bipolaris maydis botybirnavirus 1; SsBRV1, Sclerotinia sclerotiorum botybirnavirus .

BdBRV1 1 GCAAUAAAAGGCGAAGCCGGGAGGCUUUUAUUUUAUUGCCCAGUUU-UUCAUCUGGUUAA

BmBRV1 1 GCAAUAAAAGGCGAAGCCGGGAGGCUUUUAUUUUAUUGCCCAGUUUCUUCAUCUGGUUAA

SsBRV1 1 GCAAUAAAAAGCACAGCCGGAAGGCUUUCUUUUUAUUGCCCAGUUU-UUGAUCUGGUCAA

BdBRV1 60 AAUGAAGUCGGCUAUC--CAGCCAGCGGAGAGUGGAACUGGUCCUCUUCGUACGAAACCA

BmBRV1 61 AAUGAAGUCGGCUAUC--UAGCCAGCGGAGAGUGGAACUGGUCCUCUUCGUACGAAACCA

SsBRV1 60 AAUCAAACUGGCUUGCCAUAGCCACCAGAAGAUGGAACUGGUCUCUUCUGUUCUACACCA

BdBRV1 118 AACCGAGCUCCCACCCGGUGAGGUAAUCCAGUGGCAAUGCGUGGGGGAGACCUCGGCCU-

BmBRV1 119 AACCGAGCUCCCACCCGGUGAGGUAAUCCAGUGGCAAUGCGUGGGGGAGACCUCGGCCU-

SsBRV1 120 AUCCGAGCUCCCACCCGGUGCGGUAAUCCAGUGGUAAUGCGUGGGGGAGACCUCGGUUUU

BdBRV1 177 ----------CGGCCGAGUGAUUGUGCAGAACGGGUGGUGAUGUCAGCAAUGCUCACCGU

BmBRV1 178 ----------CGGCCGAGUGAUUGUGCAGAACGGGUGGUGAUGUCAGCAAUGCUCACCGU

SsBRV1 180 AAGCUUAAAGCAGCCGAGUGAUUGUGCAGAACGGGUGGUGAUGUCAGCAAUGCUCACCGU

BdBRV1 227 ACAUGUCCGUGCUAGGGAGAAUGUCCUGUAUCCAGCAGGAAGAUAUCCCGCGUGUAACGA

BmBRV1 228 ACAUGUCCGUGCUAGGGAGAAUGUCCUGUAUCCAGCAGGAAGAUAUCCCGCGUGUAACGA

SsBRV1 240 ACAUGUCCGUGCUAGGGGGAAUGUCCUGUAACCAGCAGGAAGAUACCCCGCGUGUAACGA

BdBRV1 287 CUGCAAGCACUUUGUCUCCUACGUAGAACAGUCUAUCACCUAGCGGCGCUGAUCGGCCGA

BmBRV1 288 CUGCAAGCACUUUGUCUCCUACGUAGAACAGUCUAUCACCUAGCGGCGCUGAUCGGCCGA

SsBRV1 300 CUGCAAGCACUUUGUCUCCUACGUAGAACAGUCUACCACCUAGCGGCGCUGAUCGGCCGA

BdBRV1 347 UACAGUAGGUGGUGUGUAGGCUUGCC-AGCCCGACCCCCGCCACAGACAUAGCUUCCAAA

BmBRV1 348 UACAGUAGGUGGUGUGUAGGCUUGCC-AGCCCGAACCCCGCCACAGACAUAGCUUCCAAA

SsBRV1 360 UACAGUAGGUGGUGUGUAGGCUUACCAAACCCGACCCACGCCACAG-CAAAGUUACCAAG

BdBRV1 406 CAACUACACACACACAAUACAGCAGAGUGAGCUAAUCCAGCAGCUGUAUU-ACCACAUUA

BmBRV1 407 CGACUACACACACACAACACAGCAGAGUGAGCUAAUCCAGCAGCUGUAUU-ACCACAUUA

SsBRV1 419 C--CAACACACAUACAAUAUAGUAGAGUGAGCUAAUCCAGCAACUAUAUUGAACAAUUUA

BdBRV1 465 CAGUAGAUCAACUUUUGAAUACUGUUCACGAUCAAACAAACUACUUACUUCAUCAAACCG

BmBRV1 466 CAGUAGAUCAACUUUUGAAUACUGUUCACGAUCAAACAAACUACUUACUUCAUCAAACCG

SsBRV1 477 CAGUAGAUCAACUUUUGAAUACUGUUUUCGAUCACAUACACAAAAUAACAUAUAAAACAC

BdBRV1 525 CAAAUCUUUCUAAAUAAAACAUUUAAAACCAAAAACAAUUCA-AAUGUCUUACCGUUCCA

BmBRV1 526 CGAAUCUUUAUAAAUAAAACAUUUAAAACCAAAAACAAUUCA-AAUGUCUUAUCGUUCCA

SsBRV1 537 AAGAAC----AAACUAAAACAAAUAAAACCAAAAACAAUUCAUCAUGUCUUACCGAUCCA

BdBRV1 584 AUUCUGUCUCUUUGCAUUCUGUACCCUCCAAGCAGUUGCUUGGCUGUACCUCGAUGUUGU

BmBRV1 585 AUUCUGUCUCUUUGCAUUCUGUACACUCCAAGCAAUUGCUUGGCUGUACCUCGAUGUUGU

SsBRV1 593 ACUCUAUUUCUUUGAAUUCUGUCCGCUCCAAGCAUAUGCGCGGAGUGACUUUUGUUUUAC

BdBRV1 644 UUGUUGAGAAGACCCGUGGUGGCGUCAAUCUUAAGAAGAAGAUGCCCACACGUGUUGAAG

BmBRV1 645 UUGUUGAGAAGACCCGUGGUGGCGUCAAUCUUAAGAAGAAGAUGCCCACACGUGUUGAGG

SsBRV1 653 CUGUGGAGAAGACUCGCGGGGGUAUCAGUCUUAAAAAGAAGAUGCCUACACGUGUUGAAG

BdBRV1 704 ACGCUGGUAUCCGUGCUUCCGGGAAACUCGGAGGUAAGGAGACCAGCGCAACUGCUUCAG

BmBRV1 705 ACGCUGGUAUCCGUGCUUCCGGAAAACUCGGAGGUAAGGAGACCAGCGCAACUGCUUCAG

SsBRV1 713 ACGCUGGUAUCCGUGCUUCCGAACAACUCGGAGGCAAGGAGACCAGCGCUACUGCUUCAG

BdBRV1 764 AAGCCAGCCCUCUGGGCGGCCUCUUCGAUGCAGUGAGCGCCCUUUCGAUGGAAUCUGCUG

BmBRV1 765 AAGCCAGCCCUCUGGGCGGCCUCUUCGAUGCAGUGAGCGCCCUUUCGAUGGAAUCUGCUG

SsBRV1 773 AAGCUAGCCCUCUGGGCGGCCUCUUUGACGCAGUAACUUCUCUCGCAACGGAGGUUGCCG

BdBRV1 824 AUCCUCAGUUCGGUAACCCAUCGAAUGUUCUGGAAGGUGAGAGUUAUUCUGAGUUGUGUC

BmBRV1 825 AUCCUCAGUUCGGUAACCCAUCGAAUGUUCUGGAAGGUGAGAGUUAUUCUGAGUUGUGUC

SsBRV1 833 ACCCUCAAUUCGGCACUCCGUCAACCAUCUUGGAAGGUGAGAGUUACUCCGAACUGUGCU

BdBRV1 884 UUACACAAUCCAUACUCUCGCGUAUGCCAGACAUCAACUUCAAGAACCCCUUCUUGGUUC

BmBRV1 885 UUACACAAUCCAUACUCUCGCGUAUGCCAGACAUCAACUUCAAGAACCCCUUCUUGGUUC

SsBRV1 893 UGACACAGUCGAUUCUCUCUCGCAUGCCAGAUAUCAACUUCAAGAAUCCCUUUUUGGUCC

BdBRV1 944 AAGCACCAAGUGCUAAAGACCAGGUAGUCUACAUGGCAUGGGGCUACAAGUUGAAGAGUU

BmBRV1 945 AAGCACCAAGUGCUAAAGACCAGGUAGUCUACAUGGCCUGGGGCUACAAGUUGAAGAGUU

SsBRV1 953 AGGCUCCGACUGCCAAAUACCAAACUGUCUACAUGGCAUGGGGUUACAAGUUGAAGAGCU

BdBRV1 1004 UGCCCAGUUCGCAGAAAGGCUCAGCUUACGCUGACAAGUAUACAGUGAAAUUGUGGGCGA

BmBRV1 1005 UGCCCAGUUCGCAGAAAGGCUCAGCUUACGCUGACAAGUAUGCAGUAAAAUUGUGGGCGA

SsBRV1 1013 UGCCGAGCUCACAGAAAGGCUCUGCCUAUGCUGACAAAUACGGCGUAAAGUUGUGGGCUA

BdBRV1 1064 AGACCAACGAGGUGCGAGUGCAGUACCCUGUGAUUGCUACAUCUGUUGGUUACCGCAAUA

BmBRV1 1065 AGACCAACGAAGUGCGAGUGCAGUACCCUGUGAUUGCUACAUCUGUUGGCUACCGCAAUA

SsBRV1 1073 AGACGAAGGAGGUCCGGGUGAACUACCCUGUGAUCGCCACUUCAACCGGGUACCGCAACC

BdBRV1 1124 AGAUAACCACAGAGUAUGAGCAACGAGCGACCGGCAACCUUGUCACAACACAACGUGUGG

BmBRV1 1125 AGAUAACCACAGAGUAUGAGCAACGAGCGACCGGCAACCUUGUCACAACACAACGUGUGG

SsBRV1 1133 GCAUUACAACUGAGUACGAACAACGUGCUACCGGUAACCUUGUCACAACCCAGCGUGUGG

BdBRV1 1184 ACUCUCGCGAGUUCCAGGCCAGUUUUGAUGAGAUGAAAGGCUUCCCAAUUCAGUUCAGGC

BmBRV1 1185 ACUCUCGCGAGUUCCAGGCCAGUUUUGAUGAGAUGAAAGGCUUCCCAAUUCAGUUCAGGC

SsBRV1 1193 AUUCUCGCGAGUUCCAAGCUAGGUUUGAUGAGAUGAAAGGCUUCCCGAUUGAAUUCCGUC

BdBRV1 1244 UCGGUGGUAGCGCUAAAAGCGUUGAUGGCGACAACCACAUUGCGUGGUUGGUCAUCGCCA

BmBRV1 1245 UCGGUGGUAGCGCGAAAAGCGUUGAUGGCGACAACCACAUUGCGUGGUUGGUCAUCGCCA

SsBRV1 1253 UCGGUGGUACUGCAAAGAGUGUAGACGGUGAUAACCACGUAGCGUGGCUCACCAUCGCUA

BdBRV1 1304 UCCUCAGGCUGUUUGCGCUUAAGCAAGCACAAGAGACCAAUUCCCGAGGGCACAUCACGA

BmBRV1 1305 UCCUCAGGCUGUUUGCGCUUAAGCAAGCACAAGAGACCAAUUCCCGAGGGCACAUCACGA

SsBRV1 1313 UUCUUAGACUCCUAGCUCUCAAACAAGCCCAGGAGACUAACUCCCGAGGCCACAUUGAAA

BdBRV1 1364 UGUCUACUGCUAUUGCUAGCUCAUUUAGCAUCAAUCUCGAGGACAUGGUACAGGCGCGGU

BmBRV1 1365 UGUCUACUGCUAUUGCUAGCUCACUUAGCAUCAAUCUCGAGGACAUGGUACAGGCGCGGU

SsBRV1 1373 UGACCUCCGGUAUUGCCAACCAGUUUGGCAUCAACCUUGAAGACAUGGUGCAAGCACGGU

BdBRV1 1424 CUUCUGCCAGCCACAGCGUAGCCACAGCUUUGGCUAACGCCUGGUUUGGCGCCGCUAAAC

BmBRV1 1425 CUUCUGCCAGCCACAGCGUAGCCACAGCUUUGGCUAACGCCUGGUUUGGCGCCGCUAAAC

SsBRV1 1433 CUUCCUCUAGCCACAGCGUGGCACCUGCCUUGGCUAACGCUUGGUUUGGCUCUGCCAAGU

BdBRV1 1484 CUGGUGGCAGGCCUGGUGCUGUGGAAGCCGUCCCAGACAAAAUGUUUGAGAUGGUUUUGC

BmBRV1 1485 CUGGUGGCAGGCCUGGUGCUGUGGAAGCCGUCCCAGACAAAAUGUUUGAGAUGGUGUUGC

SsBRV1 1493 CAGGCGGUAAGCCAGGAGCUGUAGAGGCCGUGCCAGACCGUGUCUUUGAGAUGGUAUUGC

BdBRV1 1544 CUAGCACUGCUGCAGACGUGAGCGAAGUAGUGUAUUUGGCAUACCUUUCUGGUAUGCUAG

BmBRV1 1545 CUAGCACUGCUGCAGAUGUAAGCGAAGUAGUGUAUUUGGCAUACCUUUCUGGUAUGCUAG

SsBRV1 1553 CCAGCAAUGCCGCAGACGCCAGCGAAGUAGUUUAUCUAGCUUACCUCUCUGGUAUGCUUG

BdBRV1 1604 AUAACUCUAUGCGAUGGAGGAACGGCGAUGAGGAACUUGGGAUCCAGCCGAUGUUCUCAU

BmBRV1 1605 AUGACUCUAUGCGAUGGAGGAACGGCGAUGAGGAACUUGGGAUCCAGCCGAUGUUCUCGU

SsBRV1 1613 ACGACUCCAUGCGCUGGAGGAACGGAGAUGAAGAGUUAGGUAUCCAACCUAUGUACUCAG

BdBRV1 1664 CGAUCCGCUCCACCGCAACAGAGCGGAUGAAAAUCCCUCUUGUUAACGCAUCUCGUGCGA

BmBRV1 1665 CGAUCCGCUCCUCCGCAACAGAGCGGAUGAAAAUUCCUCUUGUUAACGCAUCUCGUGCGA

SsBRV1 1673 CAAUCCGCUCCUCAGCAACCGAGCGUAUGAAGAUCCCUUUCGUCAAUGCGUCCCGUGCUA

BdBRV1 1724 UCCCGAUGGCAGAUUUGCGAGGCUAUGACUCUGAUCUAGAGUUAGGCCGUGCUGAAGCUG

BmBRV1 1725 UCCCAAUGGCAGAUUUGCGAGGCUAUGAUUCUGAUCUAGAGUUAGGCCGUGCUGAAGCUG

SsBRV1 1733 UUUCAAUGAAUGACUUGAAAAAAUUCAACGCCGACAUUGAACUUGGUCGGGCUGAAGCAG

BdBRV1 1784 UCUUCAACUCGUAUGUGCGUCGGCACGAACUGCAGAGCCAAGUUAAUGUUGCUCGCAGGA

BmBRV1 1785 UCUUCAACUCGUAUGUGCGUCGACACGAACUGCAGAGCCAAGUGAAUGUUGCUCGCAGGG

SsBRV1 1793 UUUUUAACUCGUACGUUAGGCGCCACGAGUUGCAAAGCCAGGUGAAUGUCGCUCGCCGGA

BdBRV1 1844 UAGCACUAUUGGCGAUGCUCGAUACCCACAGCAGCAAGAGUUCUCGUAUGCUUCUCGGCU

BmBRV1 1845 UAGCACUAUUGGCGAUGCUCGAUACCCACAGCAGCAAGAGUUCUCGUAUGCUUCUCGGCU

SsBRV1 1853 UUGCCCUCUUGGCCAUGCUCGAUACCCAUAGUAAUAAGGGCUCGCGCAUGCUUCUUGGCU

BdBRV1 1904 UACCUAAGCCUUGCCAUGUCGUCGAGUACGAUCUUUGGGUCGACCCCAAGCAUUUCAGCA

BmBRV1 1905 UACCUAAGCCUUGCCAUGUCGUCGAGUACGAUCUUUGGGUCGACCCCAAGCAUUUCAGCA

SsBRV1 1913 UACCUAAGCCCUGCCAUGUGCUCGAGUAUGACUUGUGGGUCGACCCGAAACACUACAGCA

BdBRV1 1964 CUUCCCCGCUGAGUCUCAUCGCUACAAGCGAGAGUGCGGGUUUGCUUAUGGCUUUGAGCC

BmBRV1 1965 CCUCCCCGCUGAGUCUCAUCGCUACAAGCGAGAGUGCGGGUUUGCUUAUGGCUUUGAGCC

SsBRV1 1973 CAUCACCCCUGAACCUCAUUGCGACUAGCGAGAGUGCGGGUUUGCUUAUGGCAUUAAGCC

BdBRV1 2024 AAAUGCAAGCUACAAUGCGGAAUGAUAUAUUGGUCAUGAAAUUGAUUGACCACCUCGAGA

BmBRV1 2025 AAAUGCAAGCUACAAUGCGGAACGAUAUAUUGGUCAUGAAAUUGAUUGACCACCUCGAGA

SsBRV1 2033 AAAUGCAAGCCACAAUGCGGAAUGACAUCCUUGUCAUGAAGCUCAUUGACCAUCUCGAGA

BdBRV1 2084 GUAAGGGCACACCAGUGCUUUCGUCUCUCGCCUACGAAUCGCUGAGGGAUUGGAUCUAUG

BmBRV1 2085 GUAAGGGCACACCAGUGCUUUCGUCUCUCGCCUACGAAUCGCUGAGGGAUUGGAUCUAUG

SsBRV1 2093 GCCGUGGUACCCCUGUCCUCUCCUCUCUUGCCUACGAGUCUCUUCGCGACUGGAUCUACG

BdBRV1 2144 AUGCAAUGCCCAGUGGAUUCUCCUCUUGGUCAAGAGGGUGGUUGAGUACCGUGACAGGCA

BmBRV1 2145 AUGCAAUGCCCAGUGGAUUCUCCUCUUGGUCAAGAGGGUGGUUGAGUACCGUGACAGGCA

SsBRV1 2153 AUGCCAUGCCGAGCGGCUUUUCAUCCUGGUCUAGAGGAUGGUUGAACACCGUAACUGGUG

BdBRV1 2204 CAAGCCCACCUGAAAUCAGAAGGUUGGCAAACGAUAGCGUGCAUGGAUUCUGGACUGGCU

BmBRV1 2205 CAAGCCCACCUGAAAUCAGAAGGUUGGCAAACGAUAGCGUGCAUGGAUUCUGGACUGGCU

SsBRV1 2213 GUAGCCCUCCUGAGAUCAGGCGACUCGCCAACGACAGCGUCCAUGGCUUCUGGACCGGCC

BdBRV1 2264 UGAAUGCCACGCUCUUAUCCGGCACAGUUCAUGUGAGUGCAAUGCUCUAUUACGGGGAGA

BmBRV1 2265 UGAAUGCCACGCUCUUAUCCGGCACAGUCCAUGUGAGUGCAAUGCUCUAUUACGGGGAGA

SsBRV1 2273 UCAACGCUACGAUUCUUUCUGGCACAGUACAUGUCAGUGCUAUGCUCUACUACGGUGAAA

BdBRV1 2324 AGCCUCGAACUGGAGCACUCAAAUACAUCUGGGAUGAGAACCAGAGGGUAUCGCUUGCCA

BmBRV1 2325 AGCCUCGAACUGGAGCACUCAAAUACAUCUGGGAUGAGAACCAGAGGGUAUCGCUUGCCA

SsBRV1 2333 AACCGAGAACAGGGGCACUCAAGUACAUCUGGGAGGAGACUAAGCGCGUUAGCCUAGCCA

BdBRV1 2384 GGCAAAAAUUCGUUACUGGCCCUCAAUCUAAGGUCUUGAAGUUCCUAUACUCUGGUAAAG

BmBRV1 2385 GGCAAAAAUUCGUUACUGGUCCUCAAUCUAAGGUCUUGAAGUUCCUGUACUCUGGUAAAG

SsBRV1 2393 GGCAGAAGUUUGUCACCGGACCCCAGUCUAAGGUGCUGAAGUUCUUGUAUUCUGGGAAGG

BdBRV1 2444 CCAACAUUUUUGAUACCAACCCCACCGAUUGGAUGCAUUAUCUUGCUGACUUCAGCAAGC

BmBRV1 2445 CCAACAUUUUUGAUACCAACCCCACCGAUUGGAUGCACUAUCUUGCUGACUUCAGCAAGC

SsBRV1 2453 CUAAUAUCUUCGACACCAACCCAACAGACUGGAUGCACUACCUUGCUGACUUUAGCAAGC

BdBRV1 2504 GCCGUGACACUAGAAAGAUUGACUCUUCUCUGGGUGUGCGGUCGACGAAUACAGUUACCG

BmBRV1 2505 GCCGUGACACUAGAAAGAUUGACUCUUCUCUGGGUGUGCGGUCGACGAAUACAGUUACCG

SsBRV1 2513 GUCGCGAUGCCAGGAAGAUCGAUUCAUCUCUAGGCGUACGGUCGACCAAUACAGUCACCG

BdBRV1 2564 GAGAGCCGCGUCUGAUCUACCUUGGACUGCGACCCGCAAUUCUUCAGUACGAGGAGAGGA

BmBRV1 2565 GGGAGCCGCGUCUGAUCUACCUUGGACUACGACCCGCAAUUCUUCAGUACGAGGAGAGGA

SsBRV1 2573 GAGAACCUAGAUUGAUCUACCUUGGGCUUAGACCAGCCAUUGUUCAGUAUGAGGAACGCA

BdBRV1 2624 UGGCCGAAGCGCAAGACGCAUCUGGUAUCGCAUCUCACUACGAGCCAGCAUUUGACUUUA

BmBRV1 2625 UGGCCGAAGCGCAAGACGCAUCUGGUAUCGCAUCUCACUACGAGCCAGCAUUUGACUUUA

SsBRV1 2633 UGUCUGAAGCCCAAGAUGCUUCAGGUCUUGCAUCCCACUACGAGCCUGCUUUCGAUUUCA

BdBRV1 2684 ACAGCGCAAUCUCUUUCUCCUCCGCUGUCAUGAACCUAGGGGCGAAGCCGAAGGAUGGAC

BmBRV1 2685 ACAGCGCCAUUUCUUUCUCCUCCGCUGUCAUGAACCUAGGGGCGAAGCCGAAGGAUGGAC

SsBRV1 2693 AUAACGCAAUCUCGUUCUCUUCAGCAGUAAUGAACCUCGGCACCAAACCCAAGGACGGCC

BdBRV1 2744 GCCAUGCAGAUGAUCCCGAUACCCACGACGGAAACGCUCCCGUGCCUAUGCCACGUAAGA

BmBRV1 2745 GCCAUGCAGAUGAUCCCGAUACCCACGACGGAAACGCUCCCGUGCCUAUGCCACGUAAGA

SsBRV1 2753 GCCAUUCUUCCGACCCCAGUACACACGAUGGAAACGCACCCGUACCAAUGCCAAGGAAGC

BdBRV1 2804 GGUCCAAUAGCGUCUCGGCCCAACUGGGUGUAGACAAGAUCUCGCCAGCAGGGCGCUUAU

BmBRV1 2805 GGUCCAAUAGCGUCUCGGCCCAACUGGGUGUAGACAAGAUCUCGCCAGCAGGGCGCUUAU

SsBRV1 2813 GUUCGAACAGUGUCUCUGCCCAACUCGGAGUAGACCAAAUCUCACCCGCAGGGCGCUUCU

BdBRV1 2864 UCAGCGAGCUCUUCAAGGCAAAAU------CUAACAAACCUAAAUCGCAAAGCGCAGACA

BmBRV1 2865 UCAGCGAGCUCUUCAAGGCCAAAC------CUAACAAACCUAAAUCGCAAAGCGCAGAUA

SsBRV1 2873 UCUCGGAAGUUUUCAAAGUUAAGCAACCCAAGAAGAAAGCUGACUCACA------AGAGC

BdBRV1 2918 GGCCAGAUACAGGCAAAUCUGAGAAGCUGUUUGAGCAAGGAGGUGUCGGUAGCGUACGCG

BmBRV1 2919 GGCCAGAUACAGGCAAAUCUGAGAAGCUGUUUGAGCAAGGAGGUGUCGGUAGCGUACGCG

SsBRV1 2927 AACCCGACAAGGGCGACUCAAAGAAGCUUUUCGAUCAAGGUGGGGUUGGCAGUGUACGUG

BdBRV1 2978 CAACUUUAGUUCAUGCUGCAAAAGACGCGCAACGCAAUGGGCUUGCAGAGAUCUUGCGAC

BmBRV1 2979 CAACUUUAGUUCAUGCUGCAAAGGAUGCGCAACGCAAUGGGCUUGCAGAGAUCUUGCGAC

SsBRV1 2987 GUACAUUGAUUCAACCCGCCAAAGAUGCGAGAUUCAAUGGCUUAGCCGAAACGUUGCGCC

BdBRV1 3038 AGCUGAADGUCGAAUCUUCAUCACGUCUGGAAGAUAUUCCAGACCAACUCAAAAACCCCG

BmBRV1 3039 AGCUAAAGGUCGAAUUUUCGUCACGUCUGGAAGAUAUUCCAGACCAACUCAAAAACCCCG

SsBRV1 3047 AAUUGAAAGCCGAGUCUUCUUCGAGAUUGGACGACAUCCCCGAGCAACUCAAAAACCCCG

BdBRV1 3098 AGCACGCAAAGGGAAGUGAGAUACUCGAAAUCGGAGUGGAGGAAGCCUUCGAUAACAUUG

BmBRV1 3099 AGUACGCAAAGGGAAGUGAGAUACUCGAAAUCGGAGUGGAGGAAGCCUUCGAUAACAUUG

SsBRV1 3107 AGUACGCCAAGGGAAGCGAGAUCCUCGAAAUCGGCGUUGAAGAAGCUUUCGAUAACAUCG

BdBRV1 3158 AAAAACACUUCAACGCUCAGGAUAUUGAGUACACUUACGCUCCACUCGGAGCCCGAGACU

BmBRV1 3159 AAAAGCACUUCAACGCUCAGGAUAUUGAGUACACUUACGCUCCACUCGGAGCCCGAGACU

SsBRV1 3167 AGAAACACUUCAAAGCGCAAGAUAUCGAGUAUACGUAUGCUCCUCUCGGCGCGAAACAGU

BdBRV1 3218 AUCGGGAGUUCGGCUUGCAUGCAAGCAUCCAGGCUGUCAAGGGCGAUGGUCGCUGUGGUG

BmBRV1 3219 AUCGGGAGUUCGGCUCGCAUGCAAGCAUCCAGGCUGUCAAGGGCGAUGGUCGCUGUGGUG

SsBRV1 3227 AUCGUGAGCUCACGCUCCAUGCUAAACUUCAGGCUGUUAAAGGAGAUGGCCGCUGUGGAG

BdBRV1 3278 UUCGAUCACUGCAAACAGCUUCAGUAGUCAACAACUUGAAGCCUUAUUUAGAGCUUGACU

BmBRV1 3279 UUCGAUCACUGCAAACAGCUUCAGUAGUCAACAACUUGAAGCCUUAUUUAGAGCUUGACU

SsBRV1 3287 CUCGAGCUUUGCAGACUGCUUCUGUCGUCAACAACAUCAAGCCUUACUUGGAGCUGAAUG

BdBRV1 3338 CACUCUUUAAGACUGAGUCUCAGAUCAUGGGUCUCCAGACAACGACUACAGCACCAGCAA

BmBRV1 3339 CACUCUUUAAGACUGAGUCUCAGAUCAUGGGUCUCCAGACAACGACUACAGCACCAGCAA

SsBRV1 3347 CCCUCUUCAAGACUGAAGCCCGCAUCAUGGGGCUUCAGACUUCAGAGGUUGCACCCGCAA

BdBRV1 3398 CCCAUAUGGCUGAUGACUAUAGCCUUGCGAGCGUCGCAGCCGAGUACGGCUUCUCAGUAU

BmBRV1 3399 CCCAUAUGGCUGAUGACUAUAGCCUUGCGAGCGUCGCAGCCGAGUACGGCUUCUCAGUAU

SsBRV1 3407 CACAUAUGGCUGAUGACUACAGCCUUGCAAGCCUUGCAAGCGAAUACAAUCUUGCAGUGU

BdBRV1 3458 GUAUUGUCCAUUACCAUGGCAACAUCAAGAGAAACCAGAAAGGCAUCCGCUUUUACAAAC

BmBRV1 3459 GUAUUGUCCAUUACCAUGGCAACAUCAAGAGAAACCAGAAAGGUAUCCGUUUUUACAAGC

SsBRV1 3467 GCAUUGUGCACUACAGCGGGGACAUUAAGCGAAACCAGAAAGGGCUUCGCUUCUAUAGAC

BdBRV1 3518 CACGGAAUGUUAAGAAUCCCCGCGUACUUUACGUCCAUUUAAAGGACUCCCACUACGAUG

BmBRV1 3519 CACGAAAUGUUAAGAAUCCCCGCGUACUUUACGUCCACUUGAAGGACUCCCACUACGAUG

SsBRV1 3527 CUCGAGGAGGACAGCGCUCUCAAGUACUGUUUGUUCACCUACAGGACUCGCACUACGAAG

BdBRV1 3578 CGUUAAAAGUUGACAACAACUUCAAGCCAGUUCUCGAUGCUGAGAAUGCAUCGCAAGUGC

BmBRV1 3579 CGUUAAAAGUUGACAACAACCUCAAGCCAGUUCUCGGUGCUGAGAAUGCAUCGCAAGUGC

SsBRV1 3587 CUUACAAGUUUGAGAGUUCUUGGAAAGCACUUCUGGAAGCUGAAAAUGCAUCAGAGGUUU

BdBRV1 3638 UCGCCUGGUUGAAAGACAGUGCUGAGCUCGCACACUUGGGCGCAUCAAAUCAGAGUGAC-

BmBRV1 3639 UCGCCUGGUUGAAAGACAGUGCUGAGCUCGCACACUUGGGCGCAUCAAACCAGAGUGAC-

SsBRV1 3647 CUGCAUGGCUGACCGACCGCUUCGAAACCGCA---------GCACUAAAUCGUGCUGUCC

BdBRV1 3697 --------GCUGACAGCGACUCUGACUCUGGACU-AGCCCGAAAGAGUAAGCCGCAGCAA

BmBRV1 3698 --------GCUGACAGCGACUCUGACUCUGGACU-AGCCCGAGAGAGUAAGCCGCAGCAA

SsBRV1 3698 UCGAAGCUGCCGAGAGCGACUCAGAUUCUGGAAUGAGUAAGAAGAAGUACGC----GAAG

BdBRV1 3748 UCUCUCGCUAAAAACUUGUCUUCUCUCAAGGAUAGCGAGAGUGAGUCAGCAUC-------

BmBRV1 3749 UCUCUCGCUAAAAACUUGUCUUCUCUCAAGGAUAGCGAGAGUGAGUCAGCAUC-------

SsBRV1 3754 UCCCUGGCCGCCAAUUUGUCGCGUCAAGGAAGAAGCGAAAGUGAUUCUGAAUCAGAAGAU

BdBRV1 3801 --------UUCAUCAGACGACGAAUCUCCACCAAUGCCAGCACCUAAGGCUGAGAAAACC

BmBRV1 3802 --------UUCAUCAGACGAUGAAUCCCCACCAAUGCCAGCACCUAAGGCUGAAAAAACC

SsBRV1 3814 GAUAAGAGCGUGACGUAUGACGAAUCCUUCCCGGCUCUACCUACAGCAGCAGAGAAGAUA

BdBRV1 3853 CAAGGUGGCGCUUCACGCAAGAAGCGGAACAACAGGAAGAUAGCUAAACAGAUGAACGCU

BmBRV1 3854 CAAGGUGGCGCUUCACGCAAGAAGCGGAGCAACAGGAAGACAGCUCAACAGAUGAACGCU

SsBRV1 3874 AAAGGAGGUGCUUCCAAGAGGAAGCGUUCAAACCGUCGUAUGACUAGGAGACUGAGCGAG

BdBRV1 3913 CAGAGGGAAGUUCAAGAAGAAAAAGUCUUCGAAGAUGCACAGGUGUACAACCAGCGCAUG

BmBRV1 3914 CAGAGGGAAGCUCAAGAAGAAAAAGUCUUCGAAGAUGCACAGGUGUACAACCAGCGCAUG

SsBRV1 3934 CAACAGAGACUCCAGGAGGAAGAGAUCUUUUCUUCAGCUGAGGAAUACAACCGCCAAAU-

BdBRV1 3973 UCAGAGCCGUCUUCAGGAGCGGAUAGCGGCCCCUCCACUCCAGUAGACCGAAAAGCUUC-

BmBRV1 3974 UCAGAGCCGUCUUCAGGAGCGGAUAGCGGCCCCUCCACCCCAGUAGACCGAAAAGCUCC-

SsBRV1 3993 -----------------------------------CCCUCCAACUGUCCCAGAAUCUCCA

BdBRV1 4032 -----UCUGGCGGCAACCC---------GCACCGUGGUUGGCCUAGAUACAGGCAAGACU

BmBRV1 4033 -----UCUGGCGGCAACCC---------GCACCGUGGUUGGCCUAGAUACAGGCAAGACU

SsBRV1 4018 AGAAGCGUAAAGUCAACCCAGAGCUUUAGCUCGAUGGUAGGCAUUAACACGGGCAAGAGC

BdBRV1 4078 GUAGCCGAAACUUCUUUAGCCAGGACCACUACUACAUCGGUUAGAGCUAACCGCAACCAC

BmBRV1 4079 GUAGCCGAAACUUCUUUAGCCAGGACCACUACUACACCGGUUAGAGCUAACCGCAAUCAC

SsBRV1 4078 AUCCAUGAGUCUU----------------UACCUCAAC-----GAAUGAGCGCCAACAAA

BdBRV1 4138 CUCUACGCAUUUGAGAAGGAUGACGGAAACAGCUUAGCAAUGGUCACCGCACUAAGAGAG

BmBRV1 4139 CUCUACGCAUUUGAGAAGGAUGACGGAAACAGCUUAGCAAUGGUCACCGCACUAAGAGAG

SsBRV1 4117 CUUCUACCAUCCCAACAAGACGAAGGUGAAAGGCAGGCAACGCUGAGUGCUAUGAAAGAG

BdBRV1 4198 ACUUUCGAGCAACUGCAAUUGGACAGCGAAGGUUCUCUUUCUGUAAACGAGGUAGAACUC

BmBRV1 4199 ACUUUCGAGCAACUGCAAUUAGACAGCGAAGGUUCUCUUUCUGUAAACGAGGUAGAACUC

SsBRV1 4177 AGCUUUGAGCAGCUCGCACUCGAUGGUAGUCUUUCGGAUCCCGACAUUGAAGUUGAGAGA

BdBRV1 4258 CGCAUCGUCCGGGAGUGCCGGCGCUUUGUCCGAGAAGACCAAUGGGCAGGAACUGUAUCA

BmBRV1 4259 CGCAUCGUCCGGGAGUGCCGGCGCUUUGUCCGAGAAGACCAAUGGGCAGGAACUGUAUCA

SsBRV1 4237 CGCAUCACUCGUGAGUGCAAGCGUUUCGUGCGUGAUGAACAAUGGUCAGGAACGGUAUCU

BdBRV1 4318 AAGUACCGUAUGACAGAGUUCAUCACACAGAUCCCCCACUCAAUUAGGGGUGCCACAAGC

BmBRV1 4319 AAGUACCGUAUGACAGAGUUCAUCACACAGAUCCCCCACUCGAUUAGGGGUGCCACAAGC

SsBRV1 4297 AAGUACCGCAUGACUGAGUUUGUGACACAGCUGCCUUACUCACUCAGGGAUGCAUCUUCU

BdBRV1 4378 AUCGGCCGCUUCCGACUCUGGAAGUACCUCGAGACUCUACCUGGUGUUGAUACCAAAGUA

BmBRV1 4379 AUAGGCCGCUUCCGACUCUGGAAGUACCUCGAGACUCUACCUGGUGUUGAUACCAAAGUA

SsBRV1 4357 AUCUCGAGACCCAGGUUGAUCCAGUAUAUCAAGUCGUUUCCUUCGGUCGGUGAUAAGAUA

BdBRV1 4438 AUCAGAGCAGUCUCUUCACUUGCGCUAGCUGCAGGGACUACCUGGGAUUACAUGGCACAA

BmBRV1 4439 AUCAGAGCAGUCUCUUCACUUGCGCUAGCUGCAGGGACUACCUGGGAUUACAUGGCACAA

SsBRV1 4417 UUCGAAGCUGUAGCAACUUUGGCUAUGGCUGCAGGUGUGACAUACGAAUAUAUGACGCAA

BdBRV1 4498 GACCACAGCGUAGGAGAAGAUGAGCUGAUGUACUACAUUAUCCAUGCACAGCUUUCUGCA

BmBRV1 4499 GACCACAGCGUAGGAGAAGAUGAGCUAAUGUAUUACAUUAUCCAUGCACAGCUUUCUGCA

SsBRV1 4477 CCUAAGUCCGUAGGUGACGACGAACUGAUGUAUUAUUUGAUCAAGGCACAGUUGCCUGCU

BdBRV1 4558 GUUACGAUAGACUUCAAUGCUGUCUACUACGGACUCCCGAACACCAAGAAGGUAGUCGGA

BmBRV1 4559 GUUACGAUAGACUUCAAUGCUGUCUACUACGGCCUCCCGAACACCAAGAAGGUAGUCGGA

SsBRV1 4537 GUCGCUAUAGAAUAUAACGCUGUGUACGCUGGAAUUCCAUUCACAAAAAAGAUUGUAGGG

BdBRV1 4618 UAUACCACCUACGAGACAGGGUGUCGCCACAACAUUCACGCUGAAAACACCGUCGUAUUC

BmBRV1 4619 UAUACCACCUACGAGACAGGGUGUCGCCACAACAUUCACGCUGAAAACACCGUCGUAUUC

SsBRV1 4597 UAUACUACCUACGACACCGGAAAACAUUCUGGCCCAGAUGCUCACCACACUCUGGUCUUU

BdBRV1 4678 AUUCGGCAAGAAGGGCAUCUCUGUGCCCCAUACAUCACGAGGAAGUCUGCAGACUCUCUC

BmBRV1 4679 AUUCGGCAAGAAGGGCAUCUCUGUGCCCCAUACAUCACGAGGAAGUCUGCAGACUCUCUC

SsBRV1 4657 GUCAGCCAGCAAGGACACUUGUGUGCCCCAUAUCUGACGCGAGAAUCUGCCGACUCCUUG

BdBRV1 4738 AUCCUAGAGAUGAAAGACAUCAGCAACUACUCGAAGCUCCACAACACUAUGGAUGAUCCU

BmBRV1 4739 AUCCUAGAGAUGAAAGACAUCAGCAACUACUCGAAGCUCCACAGCACUAUGGAUGAUCCU

SsBRV1 4717 AUCCUAGAGAUGAAGGAUAUCAGUAACUACAGCAAGGUGGUCCACUCAGGACAAGGUUUU

BdBRV1 4798 ACCGAACCGUCCUUCCUAGCUCCGACAAGAAGCAAAGAAUUGUGGGUGCAGUCCGUGAAU

BmBRV1 4799 ACCGAACCGUCUUUCCUAGCUCCGACAAGAAGCAAAGAAUUGUGGGUGCAGUCCGUAAAU

SsBRV1 4777 GAUGGAGUGUCAAGCUUAUCCCCGACAAGAACGCGAGAACUUUGGAUCCAAGCUGUUAAC

BdBRV1 4858 ACUGAGAUCGCCAAGAUGGGUGCCACGUCAAGAAGGUUUUCUAACCUCAAGUGCGAUCAA

BmBRV1 4859 ACUGAAAUCGCCAAGAUGGGUGCCACGUCAAGAAGGUUUUCUAACCUCAAGUGCGAUCAA

SsBRV1 4837 GUCGAGAUUGCAAAGAUGGGCGCUACUUCACGAAAACUGAGUGGCAUUGCUUGCGACCCC

BdBRV1 4918 GCAUAUUGGGAGAAAGCUUUGUCCAGUCGUACAUGCAUUGGUUCAGAUCCAGACGACACA

BmBRV1 4919 GCAUAUUGGGAGAAAGCUUUGCCCAGUCGUACAUGCAUUGGUUCAGAUCCAGACGACACA

SsBRV1 4897 GUAUACUGGGCAAAGGCAUUAGAGAGCAUAACUUGUGUCGGCUCAGACCCUGACGAUAUU

BdBRV1 4978 GCUGAGAACAACAUCGAACUCCUGUCAUGUUUUGCUGACUACCUUGGUUGCCCUGACGAC

BmBRV1 4979 GCUGAGAACAACAUCGAACUCCUGUCAUGUUUUGCUGACUACCUUGGUUGCCCUGACGAC

SsBRV1 4957 GCCGAAAACAACAUUGAGUUAUUAUCUUGCUUCGCAGACUAUCUGGGAUGCCCCGAUGAC

BdBRV1 5038 GUCUCAUUCUUCAGAACAGAGGCAAUCGAUUGGCUCGUACGAGUCAUCGGCUGGGUACCA

BmBRV1 5039 GUCUCAUUCUUCAGAACAGAGGCAAUCGAUUGGCUCGUACGAGUCAUCGGCUGGGUACCA

SsBRV1 5017 GUAUCUUUUUUUCGAACGGAAGCAGUAGACUGGCUCAUUCGAGUUCUCGGGUGGGUACCC

BdBRV1 5098 GCAGACCAGUCUUGGUUCGGAGCCGAGACCGUCAUGCUCCUCGCGCUGCACAGAGACUUC

BmBRV1 5099 GCAGACCAGUCUUGGUUUGGAGCCGAGACCGUCAUGCUCCUCGCGUUGCACAGAGACUUC

SsBRV1 5077 GACGACCAAGCAUGGUUCGGAAUGGAGACAGUAAUGCUUCUUGCACUACACAGAGAUUUC

BdBRV1 5158 CGAGUUUGGGUUGUCGAAGACACACCUGACCUCUCCAUCCACAACCUCGUGGAGCAUAAG

BmBRV1 5159 CGAGUUUGGGUUGUCGAAGACACACCUGACCUCUCCAUCCACAACCUCGUGGAGCAUAAG

SsBRV1 5137 CGAGUUUGGGUUAUUGAAGAAACCGGAGACACACAAGUACACAACAUGACAGAGCAUAAG

BdBRV1 5218 UCCUCGAAAACGCAGAGUACACUCCCACUGAUUAUGAGUGUCCAGUCUGGCAAGCUUAGG

BmBRV1 5219 UCCUCUAAAACGCAGAGUACACUCCCACUGAUUAUGAGUGUCCAGUCUGGUAAGCUUAGG

SsBRV1 5197 UUUGCAAGGACUCAGAAUACACUCCCGAUCAUCAUGAGUGAACAAGCUGGAAGACUGAGA

BdBRV1 5278 AUGCACCAGCUGAACUUACCCGCACGAGCAGGCUCUUCAAUGGAGAACCUAGCACUAGCA

BmBRV1 5279 AUGCACCAGCUGAACUUACCCGCACGAGCAGGCUCUUCAAUGGAGAACCUAGCACUAGCA

SsBRV1 5257 AUGCACCAGCUAAGACUCCCAGCAAGAGCAGGUUCUUCGCUCGAAAAUCUCGCAUUGGCU

BdBRV1 5338 UGCUUACAGCAUAGACACAAUGGCACUUACCCAGAGCCGAGUGAGCCAACCCCCACCCUC

BmBRV1 5339 UGCUUACAGCAUAGACACAAUGGCACUUACCCAGAGCCGAGUGAGCCAACCCCCACCCUC

SsBRV1 5317 UGCAAACAACAUAGGCGAGAUGGCAAAUACCCAGAGCCCAGCGAACCGACACCUACUUUA

BdBRV1 5398 CCUACACCACAAAGACCAGACGACCUGAAACUCAAGAACCCCAUGCAAGGGCACCUCCUU

BmBRV1 5399 CCUACACCACAAAGACCAGACGACCUGAAACUCAAGAACCCCAUGCAAGGGCACCUCCUA

SsBRV1 5377 CCAACACCCCAAAGACCUAGUGAUCUGAAACUCAAGCAUUCUAUGCAAGGGCACAUACUC

BdBRV1 5458 GGCUGGGUUAUAGCAGGUAGUACUCUUAUAGUUACUGUAGGCUUAGGUGUCGUUUCUUAU

BmBRV1 5459 GCCUGGGUCAUAGCAGGUAGUACUCUUAUAGUUACUGUAGGCUUAGGUGUCGUUUCUUAU

SsBRV1 5437 GGUCUAGUGAUAGCAGGAACCACAUUGGUUGUGACGGCUGGUGUCGCGGUAGUCUCUUAC

BdBRV1 5518 CGCCACAGGAAGCAGAUUAAUGGGUUAGUCAAGAAUGUGCGAGAUAUGUGGAAGGGCACG

BmBRV1 5519 CGCCACCGGAAGCAGAUCAAUGGGUUAGUCAAGAAUGUGCGAGAUAUGUGGAAGGGCACG

SsBRV1 5497 AGGAAACGUAAGAGUAUCAGCGGACUAGUAAAGAAUGUGAGGGAUAGAUGGAAGGGGGUA

BdBRV1 5578 UCUGUCUACACAGCUAGUAUUAGAGCAUUGGAAGAGGUCCAGGACACAGAGCCGUUGCUC

BmBRV1 5579 UCUGUCUACACAGCUAGUAUUAGAGCAUUGGAAGAGGUCCAGGACACAGAGCCGUUGCUC

SsBRV1 5557 UCUGCCUACACAGCAAGCAUCCGAACUCUCCAAGAGAUUGCAGAUACAGAACCACUUCUC

BdBRV1 5638 GGAGAUCAAAACACACCAUUCACGAAGGACGCGCAGCCUGGCCCUCUCUCACCGUACUAC

BmBRV1 5639 GGAGAUCAGAACACACCAUUCACGAAGGACGCGCAGCCUGGCCCUCUCUCACCGUACUAC

SsBRV1 5617 GGCAAUCAUGACACUGCUUUCACGAGUGAUGCGCAGCCAGGGCCACUCUCACCGAACUUU

BdBRV1 5698 GAGGAUUUCCAACAAGCCAUCGGAGUCAAAGACCAUCUGUCGGACGCCGGCUCUGUUCGC

BmBRV1 5699 GAGGAUUUCCAACAAGCCAUCGGAGUCAAAGACCACUUGUCGGAUGCCGGCUCUGUUCGC

SsBRV1 5677 GAAGAUUUUCAGCAAGCAUUAGGGUUGAAAGAUCAUCUCUCUGAUGUCGGCUCAGUACGC

BdBRV1 5758 AGCUUGCGAACGGUGCCAAUAGGCGACCAUAGUGUGUUCGCUACAGGACGCUGGCCAGGC

BmBRV1 5759 AGCUUGCGAACGGUACCAAUAGGCGACCAUAGUGUGUUCGCUACAGGACGCUGGCCAGGC

SsBRV1 5737 AGUUUACGGACAGUACCUCUGGGAGGGAAUACCGCCUUCGCAACGGGACGUUGGCCAGGA

BdBRV1 5818 AUUGUCUUGUUCAAAAGAUGGUGGGGUAAUGCAGGUGAAGCAGUCCACAACUAAGUUAUA

BmBRV1 5819 AUUGUCUUGUUCAAAAGAUGGUGGGGUAAUGCAGGAGAAGCAGUCCACAACUAAGUUAUA

SsBRV1 5797 AUUGUACUCUUCAAGAGAUGGUGGGGUACAGCAGGUGAAACAGUCCAAAAUUAAGUUACA

BdBRV1 5878 GCACGCAGCCGUAACUUCCGGGAAUAGCCGGACAAAAUAGCAGAAACAUAGUUUUCAUAC

BmBRV1 5879 GCACGCAGCCGUAACUUCCGGGAAUAGCCGGACAAAAUAGCAGAAACAUAGUUUUCAUAC

SsBRV1 5857 GCACGCAGCAGUAACUUCCGGGAAUAACCGGACAUAUUAGCAGAAACACAAGUUUCAUAC

BdBRV1 5938 GAGUCAAGGGUUAGUCCCAAAAUUAAGUCCCAAGAGACCUACAAAUAGU

BmBRV1 5939 GAGUCAAGGGUUAGUCCCAAAAUUAAGUCCCAAGAGACCUACAAAUAGC

SsBRV1 5917 GAGUCAAGGGUUAGUCCCAAAUUUAGGUCCCCAGCGACCUACAAAUAGC
