# Supplementary material for: Characterization of a Bbotybirnavirus Conferring Hypovirulence in the Pear Stem Wart Disease Phytopathogenic Fungus <em>Botryosphaeria dothidea</em>
Source: Preprints.org preprint supplement (doi:10.20944/preprints201902.0035.v1), 2019-02-04
Supplement: Supplementary file 2 [file Manuscript supplementary Figure 1.doc]

**Supplementary**

**Figure S1.** Multiple-sequence alignments of the dsRNA1 segment of BdBRV1, BmBRV1 and SsBRV1. Abbreviations: BdBRV1, Botryosphaeria dothidea botybirnavirus 1; BmBRV1, Bipolaris maydis botybirnavirus 1; SsBRV1, Sclerotinia sclerotiorum botybirnavirus 1.

BdBRV1 1 GCAAUAAAAGGCGAAGCCGGGAGGCUUCUAUUUUAUUGCCCAGUUUUUCAUCUGGUCAAA

BmBRV1 1 GCAAUAAAAGGCGAAGCCGGGAGGCUUCUAUUUUAUUGCCCAGUUUUUCAUCUGGUCAAA

SsBRV1 1 GCAAUAAAAAGCACAGCCGGAAGGCUUUCUUUUUAUUGCCCAGUUUUUGAUCUGGUUAAA

BdBRV1 61 AUGAAGUCGGCUAUC--UAGCCAGCGGAGAGUGGAACUGGUCCUCUUCGUACGAAACCAA

BmBRV1 61 AUGAAGUCGGCUAUC--UAGCUAGCGGAGAGUGGAACUGGUCCUCUUCGUACGAAACCAA

SsBRV1 61 AUCAAACUGGCUUGCCAUAGCCACCAGAAGAUGGAACUGGUCUCUUCUGUUCUACACCAA

BdBRV1 119 ACCGAGCUCCCACCCGGUGAGGUAAUCCAGUGGCAAUGCGUGGGGGAGACCUCGGCCU--

BmBRV1 119 ACCGAGCCCCCACCCGGUGAGGUAAUCCAGUGGCAAUGCGUGGGGGAGACCUCGGCCU--

SsBRV1 121 UCCGAGCUCCCACCCGGUGCGGUAAUCCAGUGGUAAUGCGUGGGGGAGACCUCGGUUUUA

BdBRV1 177 ---------CGGCCGAGUGAUUGUGCAGAACGGGUGGUGAUGUCAGCAAUGCUCACCGUA

BmBRV1 177 ---------CGGCCGAGUGAUUGUGCAGAACGGGUGGUGAUGUCAGCAAUGCUCACCGUA

SsBRV1 181 AGCUUAAAGCAGCCGGGUGAUUGUGCAGAACGGGUGGUGAUGUCAGCAAUGCUCACCGUA

BdBRV1 228 CAUGUCCGUGCUAGGGAGAAUGUCCUGUAUCCAGCAGGAAGAUACCCCGCGUGUAACGAC

BmBRV1 228 CAUGUCCGUGCUAGGGAGAAUGUCCUGUAUCCAGCAGGAAGAUAUCCCGCGUGUAACGAC

SsBRV1 241 CAUGUCCGUGCUAGGGGGAAUGUCCUGUAUCCAGCAGGAAGAUACCCCGCGUGUAACGAC

BdBRV1 288 UGCAAGCACUUUGUCUCCUACGUAGAACAGUCUAUCACCUAGCGGCGCUGAUCGGCCGAU

BmBRV1 288 UGCAAGCACUUUGUCUCCUACGUAGAACAGUCUAUCACCUAGCGGCGCUGAUCGGCCGAU

SsBRV1 301 UGCAAGCACUUUGUCUCCUACGUAGAACAGUCUACCACCUAGCGGCGCUGAUCGGCCGAU

BdBRV1 348 ACAGUAGGUGGUGUGUAGGCUUGCC-AGCCCAACCCCCGCCACAGACAUAGCUUCCAAAC

BmBRV1 348 ACAGUAGGUGGUGUGUAGGCUUGCC-AGCCCAACCCCCGCCACAGACAUAGCUUCCAAAC

SsBRV1 361 ACAGUAGGUGGUGUGUAGGCUUACCAAACCCGACCCACGCCACAG-CAAAGUUACCAAGC

BdBRV1 407 AACUACACACACACAAUAUAGCAGAGUGAGCUAAUCCAGCAGCUAUAUU-AACACACUAC

BmBRV1 407 AAUUACACACACACAAUAUAGCAGAGUGAGCUAAUCCAGCAGCUAUAUU-AACACACUAC

SsBRV1 420 CA--ACACAAAUACAAUAUAGUAGAGUGAGCUAAUCCAGCAACUAUAUUGAACAAUCUAC

BdBRV1 466 AGUAGAUCAACUUUUGAAUACUGUUAUCGAUC-------------ACACACAAGAUUCUA

BmBRV1 466 AGUAGAUCAACUUUUGAAUACUGUUAUCGAUC-------------AAACACAAGAAUCCA

SsBRV1 478 AGUAGAUCAACUUUUGAAUACUGUUUUCGAUCAACAUACCAAAUAACACAACAAAAUACA

BdBRV1 513 UAUACCAAUCUCACAAAUUACAAAACACAAAAA-AUGUCUUUGAACUUUGCUUCUAUUUC

BmBRV1 513 UAUACCAAUCUCACAAAUUACAAAACACAAAAAAAUGUCUUUGAACUUUGCUUCUAUUUC

SsBRV1 538 AAAACAAAU----UAAAUUUAAAAACCCAAAAAUAUGUCUUUUUCAAACAACAUCGUUUC

BdBRV1 572 UGAUUUUGCUUCUGCUGCCUCCAUUGCUUUACCGCUUGAGAUGUGGAUUGAGAUUGUCGC

BmBRV1 573 UGAUUUUGCUUCUGCUGCCUCCAUUGCUUUACCGCUUGAGAUGUGGAUUGAGAUUGUCGC

SsBRV1 594 UGUUUCUGCUUUACCUACCCUGGCUACGUUGCCGUACGAGAUGUGGAGCAGCGUUGUGUC

BdBRV1 632 GAAUUUGAGCACAUGGGAUGCUGCUUGUAUCGUCAAGAACAUCCCUGUGUGCAGAGCGCC

BmBRV1 633 GAAUUUGAGCACAUGGGAUGCUGCUUGUAUCGUCAAGAACAUCCCUGUGUGCAGAGCGCC

SsBRV1 654 UAACCUGAGCACAUGGGAUGCCGCUUGCAUCGUCAAGAACAUCCCAAUGUGCCAGUCUUU

BdBRV1 692 GGUGUACACAGCCUUAUUGGCUCGUGCAAACCAGGAGUUCAAUUUCGGGUGCUGCGUUGA

BmBRV1 693 GGUGUACACAGCCUUAUUGGCUCGUGCAAACCAGGGGUUCAAUUUCGGGUGCUGCGUUGA

SsBRV1 714 GUUGUACCAAGCACUCUUAGCCCGAGCUAACCUUGACUACAACUUCGGUUGCACCCAUGA

BdBRV1 752 AGAAAUCAUUUCUUCAAUUCCUUGCUCCCACUCCCGUCCUUGCGAAAUUGUUUCCAAGGA

BmBRV1 753 AGAAAUUAUUUCUUCAAUUCCUUGCUCCCACUCCCGUCCUUGCGAAAUUGUUUCCAAGGA

SsBRV1 774 GAAGAUCAUCUCUACUAUGCCGUGUAACCACCCCCGCACAUGCGAGGUGCUCCCGAAAGG

BdBRV1 812 UGCCCAAUUCUCGCUCGCGUGCGUAGAGCACAUUAGUGCAAGCUGCGGAUCGAGCUGCGA

BmBRV1 813 UGCCCAAUUCUCGCUCGCGUGCGUAGAGCACAUUAGUGCAAGCUGCGGAUCGAGCUGCGA

SsBRV1 834 CGGCCACUUCGCAUUCGUAUGUGCUGAGCACAUCGUGGGUACAUGCAGCGCUAGUUGCGA

BdBRV1 872 GAAAGUGCUCAUUAGUGAGUACGAUUUAGGAGUGCGGCUCAAGCACCGCGAAGCUGAACG

BmBRV1 873 GAAAGUGCUCAUUAGUGGGUACGAUUUAGGAGUGCGGCGCAAGCACCGCGAAGCUGAACG

SsBRV1 894 UAGUGUGCUCAUGAGUGCCGAUGACGUGUACUCACGUUUUAAGCGCUACGAAGAGUCACG

BdBRV1 932 UGCCCAGCGAAGAUUGGACCGUAUUUACGGCCCACUCGCUACUGAGCACGACAUGAUGGU

BmBRV1 933 UGCCCAGCGAAGAUUGGACCGUAUUUACGGCCCACUCGCUACUGAGCACGACAUGAUGGU

SsBRV1 954 GCUCCAACGCAAGCGCGACCAUAUGUAUGGUCCAUUUGCGUUGGAGCAUGACAUGAUGGU

BdBRV1 992 CAUUGAUGACCAACACUCCGAGACUUCUUCCUAUAGAGAUUAUCUUCGCUACAGCGCAGA

BmBRV1 993 CAUUGAUGACCAACACUCCGAGACUUCUUCCUAUAGAGAUUAUCUUCGCUACGGCGCAGA

SsBRV1 1014 CAUCGAUGACCAAAACGCCGCGACUUCAUCGCACCGAGACUACAUGCGCUACCGCGCAGA

BdBRV1 1052 GAUCGCUUACACGGAAGAAGAUCUCCAUAUCUCUUCACUCUUCGAAGCUGUCAGCUUCCA

BmBRV1 1053 GAUCGCUUACACGGAAGAAGAUCUCCAUAUCUCUUCACUCUUCGAAGCUGUCAGCUUCCA

SsBRV1 1074 GAUGGUCUAUGUGGAAGAAGAUCUCGCACUGGGCACACUGUUUGGAGGCGAUCUUGCCUC

BdBRV1 1112 ACCAGAGGGUAGUGAUGUAGAGAAGACUCGGGGUGGUAUGGAUGCUGCCGAUGCUGGUCC

BmBRV1 1113 ACCAGAGGGUAGUGAUGUAGAGAAGACUCGGGGUGGUAUGGAUGCUGCCGAUGCUGGUCC

SsBRV1 1134 UACAGACACCCUAGUUGUGGAGAGAACUCGUGGUGGUAUGGAUGCUGCAGGCUCUGGUGC

BdBRV1 1172 UUCUGAAUCAGCACAGGCUGCUCCUACACCCGUAGAUGAUGAGGUCCCUCAAGACGGACC

BmBRV1 1173 UUCUGAAUCAGCACAGGCUGCUCCUACACCCGUAGAUGAUGAGGUCCCUCAAGACGGACC

SsBRV1 1194 UCCAGAAGCAUCAGCUGCAGCCCCUACGCCCGUCGAAGACGAGGUACCACAAGAUGGGCC

BdBRV1 1232 UGUCACCGGAGAGCCAACCGUUGGGCUGCCACCAGGAAGUGAGGAGCCGGGCCACCCAGG

BmBRV1 1233 UGUCACUGGAGAGCCAACCGUUGGGCUGCCACCAGGAAGUGGGGAGCCGGGCCACCCAGG

SsBRV1 1254 UGUCAACGAAGAGCCCGUCGUCGGGCUACCCCCCGGAAGUGAAGAACCGAGCCAUCCAGG

BdBRV1 1292 CCCAGACGUCCCUCUUGACCCUAGGGUAACUAAUGGCGAUGACUUUGGUCAUAUUCCAAA

BmBRV1 1293 CCCAGACGUCCCUCUUGACCCUAGGGUAACUAAUGGCGAUGACUUUGGUCAUAUUCCAAA

SsBRV1 1314 ACCCGAUGUUCCACUCGACCCGAGGGUCACCAACGGCGAUGAUUUUGGUAACAUUCCAAA

BdBRV1 1352 CACCGAAGAUGCAUCCGACCCAGUCGAUGCAGUCGCCACAAACGGUUGGUUUGAAUACCC

BmBRV1 1353 CACCGAAGAUGCGUCCGACCCAGUCGAUGCAGUCGCCACAAACGGUUGGUUUGAAUACCC

SsBRV1 1374 CACGGAAGAUGCAUCUGACCCUGUCGAUGCUGUUGCCACAAACGGUUGGUUUGAGUACCC

BdBRV1 1412 AUACGCCACAGGCGGUGGGCAGGCUACAUCAUACGCAGGCCUGAUCACACAAGCAGACCC

BmBRV1 1413 AUACGCCACAGGCGGUGGGCAGACUACAUCAUACGCAGGCCUGAUCACACAAGCAGACCC

SsBRV1 1434 CUAUGCCGAAGGCAGCGGGCAAGUCGCAUCUUAUGCAGGCUUGAUUACCCAAGCCAACCC

BdBRV1 1472 CACUUCUGAGUAUGUUACAAAUAUCUCAGACCGAUUCCGAAGCAUCUCUCCUCAGUUUGA

BmBRV1 1473 CACUUCUGAGUAUGUUACAAAUAUCUCAGACCGAUUCCGAAGCAUCUCUCCUCAGUUUGA

SsBRV1 1494 AUCCUCUGAGUAUGUUACCAACAUCUCAGACCGAUUCCGCAACAUCUCUCCUCAAUUUGA

BdBRV1 1532 GGAACUUGAGCGUAACAUUCGCGUUACUUCAGGAUUCGGUGUCCAGUCUUACUUGGUGCA

BmBRV1 1533 GGAACUUGAGCGUAACAUUCGCGUUACUUCAGGAUUCGGUGUCCAGUCUUACUUGGUGCA

SsBRV1 1554 GGAGUUAGAGCGCAAUAUUCGCGUCACCUCCGGAAGCGGCGUACAGUCGUACUUGGUGCA

BdBRV1 1592 GACACUCUGGGGCUUUGGACCCCGCGGUGCUUCAUCACUGGUGACGCAAUCGGCAAAUGC

BmBRV1 1593 GACACUCUGGGGCUUUGGACCCCGCGGUGCUUCAUCACUGGUGACGCAAUCGGCAAAUGC

SsBRV1 1614 GACUAUCUGGGGCUUUGGUCCUAGAGGUGCUGCCUCACUUAUGACGCAGUCAGCAAAUGC

BdBRV1 1652 UGAUUCUCGGACUGUAGCUUUUUGGACUACGAACCCCAAAUCUGAGAUCAUACCCGUGAG

BmBRV1 1653 UGAUUCUCGGACUGUAGCUUUUUGGACUACGAACCCCAAAUCUGAGAUCAUACCCGUGAG

SsBRV1 1674 UGAUACUCGGACUGUAGCCUUUUGGACUACAAACCCCCAGUUCGAGAUUGUCCCUGUAAG

BdBRV1 1712 UGAGGAUACUAUUAUGUAUGACACACUUGCCGGGCUGUCUAUUGAAGGACAGAUGGUAAG

BmBRV1 1713 UGAGGAUACUAUCAUGUAUGACACACUUGCCGGGCUGUCUAUAGAAGGACAGAUGGUAAG

SsBRV1 1734 CGAAGAUACGAUCAUGUACGACACGCUCGCAGGACUAUCUGUUGAAGGUCAAAUGGUUCG

BdBRV1 1772 ACUGAAUACUACCUUCAACGGCAACAUGGUUACCGAUCUAUAUAAUAGUAUCGGUGACAG

BmBRV1 1773 GCUGAAUACUACCUUCAACGGCAACAUGGUUACCGAUCUAUAUAAUAGUAUCGGUGACAG

SsBRV1 1794 CUUGAACACAACCUUCAACGAUAACAUGAUCACUGACCUGUACAACAGUGUCGGCGACCG

BdBRV1 1832 GGCUAUCGCUGAGCGGUACUACGACCACGUAGUGACCGCUGCAGUGGCAGGAAGUAACUA

BmBRV1 1833 GGCUAUCGCUGAGCGAUACUACGACCACGUAGUGACCGCUGCAGUGGCAGGAAGUAACUA

SsBRV1 1854 UGCCAUCGCACAGCGUUACUACGACCACGUAGUAACAGCAGCAGUAGCUGGAAGUAAUUA

BdBRV1 1892 UGUUGCUUUUCUGACCAUGUGCUACACGCGAUUGGUCUCACUCAAGAUCAUGGCUGAGCA

BmBRV1 1893 UGUUGCUUUUCUGACCAUGUGCUACACGCGAUUGGUCUCACUCAAGAUCAUGGCUGAGCA

SsBRV1 1914 CGUUGCUUUCUUGACAAUCUGCUAUACGAGGCUCGUCGCGCUGAAGAUCAUGUCUGAGCA

BdBRV1 1952 AAAUCAGCCGGCCACAAUGCGCGUUGAGGGUGACACUCUCAACGCCAACAUUUUACUUGA

BmBRV1 1953 AAAUCAACCGGCCACAAUGCGCGUUGAGGGUGACACUCUCAACGCCAACAUUUUACUGGA

SsBRV1 1974 GAACCAGCCUGCCCAGAUGCGCGUUUCAGGAGAUACACUGAACGCAAAUAUCUUGCUGGA

BdBRV1 2012 UAACGUUGUAGCGAACUCAGUUACCAGAAGGGUAGCGGAUGCCGUAUUGCGUUCCAAGCC

BmBRV1 2013 UAACGUUGCAGCGAACUCAGUUACCAGAAGGGUAGCGGAUGCCGUAUUGCGUUCCAAGCC

SsBRV1 2034 UACCGUUGCUGCUAAUCCUGUAACUCGGAGAGUAGCCGAUGCAGUGUUGCGCUCAAAGCC

BdBRV1 2072 CACCAAUGCUGUCAUGCUCCCACAUGGCAGCAACGACCUUGAUGUCGAGACCAUGCUCUA

BmBRV1 2073 CACCAAUGCUGUCAUGCUCCCACAUGGCAGCAACGACCUUGAUGUCGAGACCAUGCUCUA

SsBRV1 2094 AACGAAUGCAGUCAUGCUCCCACAUGGCAGCAACGAUCUCGAUGUCGAGACCAUGCUUUA

BdBRV1 2132 CUUGAUGGGGCACGGCCGCGUUAUCAAGGGCGUCGCAACCGAAGAUGAAGAGAUAGCGGU

BmBRV1 2133 CUUGAUGGGGCACGGCCGCGUUAUCAAGGGCGUCGCAACCGAAGAUGAAGAGAUAGCGGU

SsBRV1 2154 UUUGAUGGGCCAUGGACGCGUUAUCAAGAGUGUCGCUACAGAUGAAGACGAAGUUGCUGU

BdBRV1 2192 CUUUUCACCUUUCGACCGAUUCCAUACCGACUCAAACUUCAAGCUGGUAGGCUUGGUUGG

BmBRV1 2193 CUUUUCACCUUUCGACCGAUUCCAUACCGACUCAAACUUCAAGCUGGUAGGCUUGGUUGG

SsBRV1 2214 UUUUUCACCAUUUGACCGGUUCCACACAGACUCCAACUUUAAGUUGUUAGGAGUUGUUGG

BdBRV1 2252 GGAGAAUGCGAUUGGACACUUCCCAGCUGGGAAUUUAGAAUUCCAAAUCGACUUCGGCCA

BmBRV1 2253 GGAGAAUGCGAUUGGACACUUCCCAGCUGGGAAUUUAGAAUUCCAAAUCGACUUCGGCCA

SsBRV1 2274 GGAGCGAGCAAUUGGCAAUUUCCCUCCCGGGAACUUGGAAUUCCAGAUCGACUUCGGCCA

BdBRV1 2312 AGCGUUCGAUUUGUUGAACCGCUAUGUAAAUCAGAAUGACUUAUGGGAUCAGUUUGCCAU

BmBRV1 2313 AGCGUUCGUUUUGUUGAACCGCUAUGUAAAUCAGAAUGAUUUAUGGGAUCAGUUUGCCAU

SsBRV1 2334 AGCGUUUGACCUCCUGAACCGCUACAUCAACCAAAAUGAUUUGUGGGAUCAGUUUGCCAU

BdBRV1 2372 UGCACGCAACAUUGCACUCGGUAUGAUCUUCUCCAGAUCAUUCUCAGCUUCAGUAGGGCU

BmBRV1 2373 UGCACGCAACAUUGCACUCGGUAUGAUCUUCUCCAGAUCAUUCUCCGCUUCAGUAGGGCU

SsBRV1 2394 UGCACGAAACAUUGCUUUGGGGAUGAUCUUCUCACGAACAUUCUCUUCCUCGGUUGGGUU

BdBRV1 2432 UCCCAAGCCUUACCACUCACGCGAUCUUGCUCUGAACAGAACAAGUACCGGCGCUAACCA

BmBRV1 2433 UCCCAAGCCUUACCACUCACGCGAUCUUGCUCUGAACAGAACAAGUACCGGCGCUAACCA

SsBRV1 2454 GCCAAAACCCUACCAUUCACGGGACCUUGCACUCAAUAGGACCCAUACUGGCGCCAACCA

BdBRV1 2492 GCAUGGCAGGCGGCGGGUUAUGGAAUUCAAGGAGUCUUUCCAUGCUUUAGUAGCCUCAGG

BmBRV1 2493 GCAUGGCAGGCGGCGGGUUAUGGAAUUCAAGGAGUCUUUCCAUGCUCUAGUAGUCUCAGG

SsBRV1 2514 ACAUGGUAGGCGCCGCGUGAUGGAGUUCAAAGAGUCCUUCCACGCUGUUGUUGCCUCGGG

BdBRV1 2552 AACGUGGCACUGCGCAGCAAUGGAAGAGACACUGUUUGAGUCCGUCGUGAACGUAAUGGA

BmBRV1 2553 AACGUGGCAUUGCGCAGCAAUGGAAGAGACACUGUUUGAGUCCGUCGUGAACGUAAUGGA

SsBRV1 2574 AACUUGGCAUUGUGCAGCUAUGGAGGAGACACUCUUUGAGUCAGUAGUCAACGUGAUGGA

BdBRV1 2612 AGAGACAGCUGGCAUAGGUCCCCGUGCCCCGAACUUCUAUGCAACAAUUGAUACGAUGCA

BmBRV1 2613 AGAGACAGCUGGCAUUGGUCCCCGUGCCCCGAACUUCUAUGCAACAAUUGAUACGAUGCA

SsBRV1 2634 AGAGACAGCUGGUAUCGGACCACGAGCACCAAAUUUCUAUGCGACGAUUGAUACGAUGCA

BdBRV1 2672 AGAUGAUUUUGAUCUUGAGUACAAGACAGCAAUGGUCUGCCUCCCGGUAGUCGAACGCAU

BmBRV1 2673 AGAUGAUUUUGAUCUUGAGUACAAGACAGCAAUGGUCUGCCUCCCGGUAGUCGAACGCAU

SsBRV1 2694 AGAUGACUUCGACCUUGAGUACAAAACUGCGAUGGUCUGCCUUCCGGUAGUCGAGCGCAU

BdBRV1 2732 GACUGGUACUCCUUCGAACCAUAUCCACCAGUAUGUUAGCAAGAGCAACACUGCCUUUAU

BmBRV1 2733 GACUGGUACUCCUUCGAACCAUAUCCACCAGUAUGUUAGCAAGAGCAACACUGCCUUUAU

SsBRV1 2754 GACAGGUACUUCGUCGAGCCACAUCCACCAAUAUGUCAGCAAGAGCAAUGUUGCUUUCAU

BdBRV1 2792 GAAGGCUAUCAGCUUUGGAUGGGAAUCGAAGCCAAUCCGCAUCUCCAGCUACUUAGCUUU

BmBRV1 2793 GAAGGCUAUCAGCUUUGGAUGGGAAUCGAAGCCAAUCCGCAUCUCCAGCUACUUAGCUUU

SsBRV1 2814 GAAAGCCAUCAGUUUUGGUUGGGAGUCGAAACCUAUUCGCAUUUCCAGCUACCUCGCUCU

BdBRV1 2852 GGAGAUCACUCCUGAAGAUAAGAAUUUCAAAUUCUUGUUCGACAAGAGUGCCCGUACUGC

BmBRV1 2853 GGAGAUCACUCCUGAAGAUAAGAAUUUCAAAUUCUUGUUCGACAAGAGUGCCCGUACUGC

SsBRV1 2874 CGAAAUUACCCCCGAAGAUAAAAAUUUCAAGUUCUUAUUUGACAAGAGUGCACGAACAGC

BdBRV1 2912 ACUCCUCAAACAAGAGAAGUACACAUGGCGAGAGUCUGUGCUGACCUCGUUUGUCUGCCA

BmBRV1 2913 ACUCCUCAAACAAGAGAAGUACACAUGGCGAGAGUCUGUGCUGACCUCGUUUGUCUGCCA

SsBRV1 2934 GCUGCUCAAGCAGGAGAAGUUUACAUGGCGUGAAGCUGUGUUGACUUCUUUCGUCUGCCA

BdBRV1 2972 CUCACAGUGGGGACCCAGCGAGCAGCACCGGUCUUACGGUGAGUUUUACGAUGAUGGCAU

BmBRV1 2973 CUCACAGUGGGGACCCAGCGAGCAGCACCGGUUUUACGGUGAGUUUUACGAUGAUGGCAU

SsBRV1 2994 CUCGCAGUGGGGUCCCAGUGAACAGCACCGAUUCUACGGUGAGUUCUAUGAUGAUAAUAU

BdBRV1 3032 CUCUGCCCUCCGAGAGCAAACCCCUUUCUACGGGUAUCUCGGUAGAAGUCAACUCGAACA

BmBRV1 3033 CUCUGCCCUCCGAGAGCAAACCCCUUUCUACGGGUAUCUCGGUAGAAGUCAACUCGAACA

SsBRV1 3054 CUCUGACCUCCGCGAACAGGUUCCCUUCUAUGGGUAUCUAGGCCGAAGCCAGCUUGAACA

BdBRV1 3092 CUUGGAAGGUACGCCUACCAUUUGGAACACGAGCACAGCUGCUACACGAAUUGAGUUCAC

BmBRV1 3093 CUUGGAAGGUACGCCUACCAUUUGGAACACGAGCACAGCUGCUACACGAAUUGAGUUCAC

SsBRV1 3114 UCUCGAAGGUUCACCGACCAUUUGGAAUACUAGCACCGCUGCUACACCUCUUGAGUUCAC

BdBRV1 3152 UAAGCCAGCUAGCCUGGCCCGCGCAACGCAUGGGCUCAACGAAGAUGAAGCUUCUCAGGU

BmBRV1 3153 UAAGCCAGCUAGCCUGGCCCGCGCAACGCAUGGGCUCAACGAAGAUGAAGCUUCUCAGGU

SsBRV1 3174 AAAACCGAAGAGCUUGACACGAGUCACUCGUGAUCUCAACGAAGAGGAGGCCAUGCAAGU

BdBRV1 3212 AGACUCACUUUGGGCUACUAUGAAAGCAGCACUUGAGGCUGCUUCUGCAGACAACGAUGC

BmBRV1 3213 AGACUCACUUUGGGCUACUAUGAAAGCAGCACUUGAGGCUGCUUCUGCAGACAACGAUGC

SsBRV1 3234 GGACUCUUUGUGGGCCACCAUGAAAGCCGCACUUGAAGCUGCCUCUGCAGAGAAUGAUGC

BdBRV1 3272 UGAGGAGAGUGACGAUGAUGAAUUUGUCAGCCCUCCGCAACCAACUGCAAACCCAACGCA

BmBRV1 3273 UGAGGAGAGUGACGAUGAUGAAUCUGUCAGCCCUCCGCAACCAACUGCAAACCCAACGCA

SsBRV1 3294 CGAGGAAGAUGAAGAUGAUGAGGAAUUUGAGUACCCACAACCAACUGCUAACCCAACAGG

BdBRV1 3332 AAAGGGCCGGCGCUUCGAAGUCCGCGAGCCUAAAGGCAAGGAGAUAGCCCGGGUUGUACC

BmBRV1 3333 AAAGGGCCGGCGCUUCGAAGUCCGCGAGCCUAAAGGCAAGGAGAUAGCCCGGGUUGUACC

SsBRV1 3354 CCAGGGACAGCGCUUCGAGCUCCACGAGCCGAAAGGUAAGGAGGUAGAGCGCAGUAUACC

BdBRV1 3392 UGAACCAGAACACCAGCGCGCUGGCACAGACAGGCCGAUCCCCACUUCGCAGUGGCAAAA

BmBRV1 3393 UGAACCAGAACACCAGCGCGCUGGCACAGACAGGCCGAUCCCCACUUCGCAGUGGCAAAA

SsBRV1 3414 UGAGCCGGAACAGCAGCGUGCUGGCACUGAUCGCCCGAUCCCUGCUUCGCAGUGGCAAAG

BdBRV1 3452 ACCUAAGCAUACUGCUAAGGCUGUAACUGCUGCUAAUCAAAAUGGGUUAGUCCAAA---A

BmBRV1 3453 ACCUAAGCAUACUGCUAAGGCUGUAAUUGCUGCUAAUCAAAAUGGGUUAGUCCAAA---A

SsBRV1 3474 ACCUAAGAAUGCAGCCCG---UGUCAGUGCAAGUGUCGAGAAGACACAAGUACAGGCCCG

BdBRV1 3509 GAACUAUUUCCAAAAGUUGACUCCAGCUCCUACUUUGAUUGGGCUGAACCCCAACGGAGG

BmBRV1 3510 GAACUAUUUCCAAAAGUUGACUCCAGCUCCUACUUUGAUUGGGCUGAAUCCCAACGGAGG

SsBRV1 3531 GAAUUACUUCCAAGGUUUAGCAACUCCAAGUAGGUUGAUCGGUUUCAAUCAAAGCACACC

BdBRV1 3569 CACCCCAGGUGCACAGGCCCAAGGCCCGAGUAGGCAGCUGACUACAAGUACCAUCAAGCG

BmBRV1 3570 CACCCCAGGUGCACAGGCCCAAGGCCCGAGUAGGCAGCUGACUACAAGUACCAUCAAGCG

SsBRV1 3591 GACACCUGAAAUGGUGCCACAACAGCGGAACUCUCCCCUCGCGAUCAAGACUCUUAAGAA

BdBRV1 3629 GAUGACCCCAAAGCAAUCCGAUCGCGCAGAUCAUGCCUACUUGGACUCACAAAUCAAGAG

BmBRV1 3630 GAUGACCCCAAAGCAAUCCGAUCGCGCAGAUCAUGCCUACUUGGACUCACAAAUCAAGAG

SsBRV1 3651 GGUCUCUGAUCGCCAAAAGGACUACGAAGAGCAUGUAUACUUGGAUACCCAAGUCAAGAA

BdBRV1 3689 AGUCACGUCUGAGCGUCGUCUGUUUGAGCAAGCUAACCGCGGUGGU------------GC

BmBRV1 3690 AGUCACGUCUGAGCGUCGUCUGUUUGAGCAAGCUAACCGCGGUGGU------------GC

SsBRV1 3711 AACAGCCGCCGAACGUAGGCAGUUCGAGCAAUACCAUCGAGGUGGUAUGCAGAAGAAAGC

BdBRV1 3737 UACUCGCUCUGGCUCUAAGAAGAAAGAGAAGGUGAUCCCCGCCGUACUCCGUGACGAGGU

BmBRV1 3738 UACUCGCUCUGGCUCUAAGAAGAAAGAGAAGGUGAUCCCCGCCGUACUCCGUGACGAAGU

SsBRV1 3771 AAAUCGC------------AAGGAUAAGAGAGUCGCCCCUGCACAAGUUCGCGAUGAGGU

BdBRV1 3797 CGAGCAACUGUGUUCUCGCAUGGUAACUGACCUCAGGUUCCGUGUAGACCUACUGACUAG

BmBRV1 3798 CGAGCAACUGUGCUCUCGCAUGGUAACUGACCUCAGGUUCCGUGUGGACCUACUGACUAG

SsBRV1 3819 AGAACAACUAUGCUCACGCAUGGUCACUGAUCUGAGGUUCAGAACCGAGCUCCUCACAAG

BdBRV1 3857 ACUCCCAUCAACUGAAGACGAAUCUAAAGCUGUCGACUUCUUGUAUCCCAGGGGGAAAGA

BmBRV1 3858 ACUCCCAUCAACUGAAGACGAAUCUAAAGCUGUCGACUUCUUGUAUCCCAGGGGAAAAGA

SsBRV1 3879 ACUACCAGCCACCGAGAAUGAGUCUAAGGCCGUAGAUUUCCUGUACCCGAGGGGAAAAGA

BdBRV1 3917 UGGCUCGCUGAAGCGAGCUGUAUACACAAUCGGGACACUCUUGAGGAAGCUCAAGACAGA

BmBRV1 3918 UGGCUCGCUGAAGCGAGCUGUAUACACAAUCGGGACACUCUUGAGGAAGCUCAAGACAGA

SsBRV1 3939 UGGAUCACUCAAGCGGGCUGUCUACACAAUCGGAACGCUCUUGCGAAAGCUUAGAUGCGA

BdBRV1 3977 UAGAAAACUCACAGUUGAACAGCAGGCAGAUAUCAGUCUGUUCUUGAAUUCCAACGUCGG

BmBRV1 3978 UAGAAAGCUCACAGUUGAACAGCAAGCAGAUAUCAGUCUGUUCUUGAAUUCCAACGUCGG

SsBRV1 3999 UGAAAAACUCACAGCUACACAGAAGUCCGACAUCAAUCUUUUCCUGACAACCAACGUCGG

BdBRV1 4037 CGGGAAGAAUGCUUGGGCUGUAGCCAUAGUGAUGUUUAUCACGUUAAACACUCUGACACC

BmBRV1 4038 CGGGAAGAAUGCUUGGGCUGUAGCUAUAGUGAUGUUUAUCACGUUAAACACUCUGACACC

SsBRV1 4059 AGGGAAGAAUGCUUGGGCUGUUGCUGUAGUCAUGUUUAUCUCAUUGAACACACUCACCCC

BdBRV1 4097 AGAGUGCUACCAGAUGCUCAAGAGCUACGGUCUACUCACUACCCAGUACAACCACUGGAA

BmBRV1 4098 AGAGUGCUACCAGAUGCUCAAGAGCUACGGUCUACUCACUACCCAGUACAACCACUGGAA

SsBRV1 4119 AGAUUGCUACGAGAUGCUUAAGAGCUACGGAUUCUUGACAACACCAUACAACCAAUGGAA

BdBRV1 4157 CGACAAGUGGAGCAGAAUCAAUGAUAUGUUCCGCAACCAGAUGGACUCUGAGACAUGGGG

BmBRV1 4158 UGACAAGUGGAGCAGAAUCAAUGAUAUGUUCCGCAACCAGAUGGACUCUGAGACAUGGGG

SsBRV1 4179 UGAUAAGUGGAGUAAGAUUAAUGACUUAUUCCGCAAUCAAAUGGAUUCCGAGACAUGGCU

BdBRV1 4217 GUUUUCUGAAACAGAUUUCCCGCAAUGUCUUUACAUUGCUGGGUUUGUAGGGAGACCACA

BmBRV1 4218 GUUUUCUGAAACAGAUUUCCCGCAAUGUCUUUACAUUGCUGGGUUUGUAGGGAGACCACA

SsBRV1 4239 AUACUCCGAGACUGAUUUCCCGCAGUGCUUAUACAUUGCUGGGUUCGUAGGUCGCCCGCA

BdBRV1 4277 UCGUGAGGCUGAUUGGGAAGCAGAGAACAUCAAGCGCUCUGCAGAACCAAAGCCUAUCAA

BmBRV1 4278 UCGUGAGGCUGAUUGGGAAGCAGAGAACAUCAAGCGCUCUGCAGAACCAAAGCCUAUCAA

SsBRV1 4299 CAGGGAAGCAGACUGGGAAGCUGAGAAUGCCAAAAGGUCUGCUGAACCAAAGCCAAUUCG

BdBRV1 4337 GAAGUACACCAAGUCUGGUUUCCAAGAUAUGUCGGAGGAAGAUGAGCGGGUGAUGAUCUU

BmBRV1 4338 GAAGUACACCAAGUCUGGUUUCCAAGAUAUGCCGGAAGAAGAUGAGCGGGUGAUGAUCUU

SsBRV1 4359 GAAGUUUACCAAGUCAGGAUUUGUAGACAUGAGUGAAGAGGAUGAGAAGAGAAUGAUCUU

BdBRV1 4397 AGAUUUUCUUUACUCCGAAGCUUCAUUCAGGAUCAAGCGCGUCCAAGGAUUUGAGCGGUG

BmBRV1 4398 AGAUUUUCUUUACUCCGAAGCUUCAUUCAGGAUCAAGCGCGUCCAAGGAUUUGAGCGGUG

SsBRV1 4419 GGAUUUUCUAUACUCAGAAGCAACAUUCAGAAUCAAGAGAGUGCAAGGGUUUGAACGCUG

BdBRV1 4457 GUACAGGAACCGCGCUGAGUGGAUGAUCAAAGGUUCAAUGUCAGGUGAAAAAACAAUCCU

BmBRV1 4458 GUACAGGAACCGCGCUGAGUGGAUGAUCAAAGGUUCAAUGUCAGGUGAAAAAACAAUCCU

SsBRV1 4479 GUACCGAAGUCGUGCAGAGUGGAUGAUUAAAGGAUCAAUGUCUGGUGAAAAGACAAUCCU

BdBRV1 4517 UGACACAGAACCAGUAGUUAUGGCAAAACUGAAGGACUUGGGUCUUAAAGUAGAUGGGCA

BmBRV1 4518 UGACACAGAACCAGUAGUUAUGGCAAAACUGAAGGACUUAGGUCUUAAAGUAGAUGGGCA

SsBRV1 4539 UGAUACAGAACCUGUUGUGAUGGCAAAGCUCAAGGACUUAGGUCUGAAAGUCGAUGGUCA

BdBRV1 4577 UGCUAAUAAGAUGCAUAUCGCUGAGAAAGUAGAUUACACAUGGAUGAUCGCUGUGCUCGA

BmBRV1 4578 UGCUAAUAAGAUGCAUAUCGCUGAGAAAGUAGAUUACACAUGGAUGAUCGCUGUGCUCGA

SsBRV1 4599 UGCAAACAAGAUGCAUAUCGCUGAGAAAGUCGAUUACACUUGGAUGAUUGCCGUACUAGA

BdBRV1 4637 CAUGGACCCAGUCCAUCUCGCAAAAAUGCACACCAAAGGCCAAGAGAAUGGUAAGGUACG

BmBRV1 4638 CAUGGACCCAGUCCAUCUCGCAAAAAUGCACACCAAAGGCCAAGAGAAUGGUAAGGUACG

SsBRV1 4659 CAUGGACCCCGUCCAUCUAGCUAAGAUGCAUACCAAAGGUCAAGAGAAUGGGAAAAUUCG

BdBRV1 4697 AUCUAUCCAAGGGAGCUGCUACAGCCACUACGUCUUCGGGAAUUAUUGGAGUACGCAUUU

BmBRV1 4698 AUCUAUCCAAGGGAGCUGCUACAGCCACUACGUCUUCGGGAAUUAUUGGAGUACGCAUUU

SsBRV1 4719 CUCUAUCCAGGGCAGUUGCUACAGUCACUAUGUCUUUGGAAACUAUUGGAGUACACACUU

BdBRV1 4757 GGAGAGCACCCUCACCUUGAAGGCAGCUACAAUGAACAAGCGAAACAGCCAAUUGCUCGA

BmBRV1 4758 GGAGAGCACCCUCACCUUGAAGGCAGCUACAAUGAACAAGCGAAGCAGCCAAUUGCUCGA

SsBRV1 4779 GGAAAGUACACUGACACUUAAGGCUGCUACUAUGAACAAGAAGAACAGCCAGCUGCUAGA

BdBRV1 4817 AGAGAAGGAAGAGCGGAGACGGGCUUCAUUCAACACAAACACCUACAAGGUUUGUGCUGA

BmBRV1 4818 AGAGAAGGAAGAGCGGAGACGGGCUUCAUUCAACACAAACACCUACAAGGUUUGUGCUGA

SsBRV1 4839 GGAGAAAGAAGAGCGAAGAAAAUCCUCAAUCAAUACUGCCACCUACAAAGUGUGUGCAGA

BdBRV1 4877 CUACCCAGACUUCGGUGCGACCCAUUCUUGUCGUCAGCAAAGGCUAGUUUUGGAGUGCAU

BmBRV1 4878 CUACCCAGACUUCGGUGCGACCCAUUCUUGUCGUCAGCAAAGGCUAGUUUUGGAGUGCAU

SsBRV1 4899 CUACCCAGACUUUGGAGCUACACACUCCUGUCGCCAGCAACGACUGGUUCUCGAGUGCAU

BdBRV1 4937 CCUAGAGGUUGCAUGCUCGCAAGGCUUUUUGCCAGACGAAGAGUUUUUGCGCAUCCACAA

BmBRV1 4938 CCUAGAGGUUGCAUGCUCGCAAGGCUUUUUGCCAGACGAAGAGUUUUUGCGCAUCCACAA

SsBRV1 4959 ACUCGAAGUAGCCUGCGCCCAAGGGUUUUUGCCAGAUAAGGAAUUCUUGCGCAUCCACGA

BdBRV1 4997 GUGGUAUUCUCAGAGUUUUGAAAACCAGUACUGGAUGCGGCCAGAUACUUAUGAGUGGUA

BmBRV1 4998 GUGGUAUUCUCAGAGUUUCGAAAACCAGUACUGGAUGCGGCCAGAUACUUAUGAGUGGUA

SsBRV1 5019 GUGGUAUGCUAAGAGUUUUGAGAACCAAUACUGGAUGAGGCCUGAUACCUACGAGUGGUA

BdBRV1 5057 UCGCGCUACUACAGGUAUGUUCUCAGGUGUUGUCCAAACUACAUUGAUUAAUACUGUCAU

BmBRV1 5058 UCGCGCUACUACAGGUAUGUUCUCAGGUGUUGUCCAAACUACAUUGAUUAAUACUGUCAU

SsBRV1 5079 CAGAGCCACAACAGGAAUGUUUUCAGGUGUAGUCCAAACAACUUUGAUCAACACCGUCAU

BdBRV1 5117 GAACGGUGCAUUGAGGCGGCACUACCUCAAGACUCUCAGCAAGAUGGGUAGUCCAGUAUC

BmBRV1 5118 GAACGGUGCAUUGAGGCGGCACUACCUCAAGACUCUCAGCAAGAUGGGUAGUCCAGUAUC

SsBRV1 5139 GAAUGGCGCACUCCGAAGGCACUACCUUAAGACAUUGAGUCUGAUGGGCAACCCGGUGUC

BdBRV1 5177 AAUGCUCCGCAACUAUGAGUUAGGAGACGAUGGCUGGGCAGAGUUCCCAACCAGAGAGCA

BmBRV1 5178 AAUGCUCCGCAACUAUGAGUUAGGAGACGAUGGCUGGGCAGAGUUCCCAACCAGAGAGCA

SsBRV1 5199 AAUGUUGCGCAACUUUGAGUUGGGAGAUGAUGGUUGGGCUGAGUUCCCAUCGCGAGCGCA

BdBRV1 5237 AGCAGAAAGCUAUAUUGCUGUCAUCCCUCUCUGUGGCAAAGAGCUCAACCCCUUGAAGCA

BmBRV1 5238 AGCAGAAAGCUAUAUUGCUGUCAUUCCUCUCUGUGGCAAAGAGCUCAACCCCUUGAAGCA

SsBRV1 5259 AGCUGAGGCUUACAUCGCAGUGAUUCCCCUCUGCGGCAAAGAGCUGAAUUCGUUGAAGCA

BdBRV1 5297 GUUGAUCUCAAGUAUAUCGAGUGAGUACCUGCGCGAGUGGUAUACGAAUGGCACAAUCUA

BmBRV1 5298 GUUGAUCUCAAGUAUAUCGAGUGAGUACCUGCGCGAGUGGUAUACGAAUGGCACAAUCUA

SsBRV1 5319 GCUGAUCUCAAGCAUUUCUAGCGAAUACUUGCGCGAGUGGUAUACUAACGGUACCAUCUA

BdBRV1 5357 CGGCUGUGCGUCGCGAGCACUCGCAAUGUUGGUAAGUGGAAACGUUGAGAGUAACAUUGC

BmBRV1 5358 CGGCUGUGCGUCGCGAGCACUCGCAAUGUUGGUAAGCGGAAACGUUGAGAGUAACAUUGC

SsBRV1 5379 UGGAUGUGCAUCGCGUGCACUUGCCAUGCUAGUAAGUGGAAAUGUAGAGAGCAACAUUGC

BdBRV1 5417 GUCCGCAGGAGCUGUACGACUUCGAGAGUUGUACGAAAGUUUCAGCACACUAAGAUUGCG

BmBRV1 5418 GUCCGCAGGAGCUGUACGACUUCGAGAGUUGUACGAAAGUUUCAGCACACUAAGAUUGCG

SsBRV1 5439 CUCUGCAGGAGCUGUACGCCUACGAGAACUGUACGAAAGCUUCAGCACUUUGAGGCUGCG

BdBRV1 5477 GCACUUCAAACCUCAGAUGUGUCAGUACUACUUUGAAGACUUGGCUGUCUACGAAGUGCG

BmBRV1 5478 GCACUUCAAACCUCAGAUGUGUCAGUACUACUUUGAAGACUUGGCUGUCUACGAAGUGCG

SsBRV1 5499 UCACUUUAAGCCAGAGAUGUGUCAGUAUUACUUUGAAGACCUAGCAGUCUACGAAGUAAA

BdBRV1 5537 ACACGGCAAACUUGGCAGAGUGAAGGUGUUACGGUACCUCUAUUCAAGCCGAGACCAAAU

BmBRV1 5538 ACACGGCAAACUUGGCAGAGUGAAGGUCUUACGGUACCUCUAUUCAAGCCGAGACCAAAU

SsBRV1 5559 ACACGGAAAACUCGGUCGUGUCAAGGUGCUCAGGUACCUUUACUCAAGCCGAGACCAGAU

BdBRV1 5597 GGGUAUGGGCCUGUACCCAAUCGACCAGAUGCCACGAGACCUACAGGACUACGCAAAUAU

BmBRV1 5598 GGGUAUGGGCCUGUACCCAAUCGACCAGAUGCCACGAGACCUACAGGACUACGCAAAUAU

SsBRV1 5619 GGGCAUGGGAUUGUAUCCUAUCCACCAAAUGCCUGGAGAUUUACAAGACUACGCAAACAU

BdBRV1 5657 GAGCACAGCUGAUCAAACUAACCAGACCGGUGAUGUUGAGCGCGCUGCAGAGAUAUUAUU

BmBRV1 5658 GAGCACAGCUGAUCAAACUAACCAGACCGGUGAUGUUGAGCGCGCUGCAGAGAUAUUAUU

SsBRV1 5679 GAACUCAGCGGAGCAGACAAACCAACUGGGUGAUGUCGAGCGGGCUGCUGAGAUCAUCUU

BdBRV1 5717 CGAGCAGAAAGUCUACGGACGCUUUAAGGCAUCGAAGGAUUACGUUGAUGAUACUACAAA

BmBRV1 5718 CGAGCAGAAAGUCUACGGACGCUUUAAGGCAUCGAAGGAUUACGUUGAUGAUACUACAAA

SsBRV1 5739 UGAGCAAAAGGUCUACGGACGCUUCAAAGCAUCGAGGGAUUAUGUUGAUGAUACUACCAA

BdBRV1 5777 GCGCUACAACGUUACCUGGCGUCAUCAAGGCAAGGCGAGAGCAACAGCCACAAUCGCUGC

BmBRV1 5778 GCGCUACAACGUUACCUGGCGUCAUCAAGGCAAGGCGAGAGCAACAGCCACAAUCGCUGC

SsBRV1 5799 ACGAUACAACGUCACCUGGCGCCAUCAAGGGAAAGCGAGAGCUACAGCAACUAUUGCAGC

BdBRV1 5837 UCAAAAUGUAGUUGAAGGGAACAAAACUACCCACGCACAGCAUGACGAACUAGAAGUCGC

BmBRV1 5838 UCAAAAUGUAGUUGAAGGGAACAAAACUACCCACGCACAGCAUGACGAACUAGAAGUCGC

SsBRV1 5859 GCAAAAUGUUGUGGAAGGGAACAAAACAACCCAGACGCAGCACAGCGAGCUGGAGGUAGC

BdBRV1 5897 UGUACUGUUGAGUAGUUUCUCGUCAAAAGUUUGGGCUCGUAAGAGUGACAUCUUAGUGUG

BmBRV1 5898 UGUACUGUUGAGUAGUUUUUCGUCAAAAGUUUGGGCUCGUAAGAGUGACAUCUUAGUGUG

SsBRV1 5919 UGUACUUCUAAGCAGUUUCUCGUCGAAGAUCUGGGAGAAGAGAAGCGAUGUGCUAGAGAG

BdBRV1 5957 UGCCAAGCCAGCGCGCAUCAGUGCGCUGGAAAUUGAAAAACAAUACUUCAAAGCUACAUU

BmBRV1 5958 UGCCAAGCCAGCGCGCAUCAGUGCGCUGGAAAUUGAAAAACAAUACUUCAAAGCUACAUU

SsBRV1 5979 AGCAAAGCCUGCAAGUAUCAGUGCGAGGGAGAUCGAGAAACAGUACUUCAAGGCGACGCU

BdBRV1 6017 UGAAGACCAGCGCUUGCUGUCGCAGAUCGGGCAGCUUGCUAAGAUCGCAAAAUACAUGAC

BmBRV1 6018 UGAAGACCAGCGCUUGCUGUCGCAGAUCGGGCAGCUUGCUAAGAUCGCAAAAUACAUGAC

SsBRV1 6039 UGAAGAUCAGAGGCUCUUGUCUCAGAUCGGGCAGUUGGCCAAGAUCGCGAAGUAUAUGAC

BdBRV1 6077 UGAAGAAUCGGUAUCCAGAAUCGCUAUGGAUAUUGCGCUAGAAAAUAGCAUUCCACUUGA

BmBRV1 6078 UGAAGAAUCGGUAUCCAGAAUCGCUAUGGAUAUUGCGCUAGAAAAUAGCAUUCCACUUGA

SsBRV1 6099 GGAGGAGUCUAUUACUAGGAUAGCGAUGGAUAUUGCACUUGAGAACGGUAUACCGCUCGA

BdBRV1 6137 AAAAGUGGAGAAAGCGAUACGGACAUUGAGCUCAUUGAAAGGUGAAGGUCUCGAUUAUCC

BmBRV1 6138 AAAAGUGGAGAAAGCGAUACGGACAUUGAGCUCACUGAAAGGUGAAGGUCUCGAUUAUCC

SsBRV1 6159 GAAGGUGCAGAAGGCGAUUCGGACUUUGAGUUCGUUGAAGGGCGAGGGGCUUGACUACCC

BdBRV1 6197 UCCAAGGCCACUACUAUCACAAGAGUUGAUGGGGAUAUAUUCACAGUGGAAAACUGUGGA

BmBRV1 6198 UCCAAGGCCACUACUAUCACAAGAGUUGAUGGGGAUAUAUUCACAGUGGAAAACUGUGGA

SsBRV1 6219 CCCAAGACCGUUACUCUCACAGGAGUUGAUGGGGAUAUACUCACAAUGGAGUGCAGUCGA

BdBRV1 6257 CAAGAGGGAAGAUGAUAUGUAUUUGCCGGAGUGGUUGAUGGUGCUAGCACCACAUUACCG

BmBRV1 6258 CAAGAGGGAAGAUGAUAUGUAUUUGCCGGAGUGGUUGAUGGUGCUAGCACCACAUUACCG

SsBRV1 6279 UAAGCGAGAGAGUGGCGCGUAUCUACCAGAUUGGUUGAUUACGUUAGCACCACACUACCG

BdBRV1 6317 CACAUAAACGUUAACACACGCAGUGUUGAGGGAAGGGAUUGAGAAUU-AAGCAGAAACUA

BmBRV1 6318 CACAUAAACGUUAACACACGCAGUGUUGAGGGAAGGGAUUGAGAAUU-AAGCAGAAACUA

SsBRV1 6339 CACAUAAACGUUAACACAUGCAGUGUUGAGGAGAGGGAUUGAGAAUUAAAGCAGAAACUA

BdBRV1 6376 UGUUUCAUACGAGUUAAGGGUUAGUCCCAAAAAUAGAUCCCAGAGGAUCUACAAAUAGU

BmBRV1 6377 UGUUUCAUACGAGUUAAGGGUUAGUCCCAAAAAUAGAUCCCAGAGGAUCUACAAAUAGC

SsBRV1 6399 AGUUUCAUACGAGUUAAGGGUUAGUCCCAAAAAUAGAUCCCAGAGGAUCUACAAAUAGC
