# Supplementary material for: Characterization of a Bbotybirnavirus Conferring Hypovirulence in the Pear Stem Wart Disease Phytopathogenic Fungus <em>Botryosphaeria dothidea</em>
Source: Preprints.org preprint supplement (doi:10.20944/preprints201902.0035.v1), 2019-02-04

**Supplementary**

**Figure S3** Genomic organization schematic diagrams of Botrytis porri botybirnavirus 1 (BpRV1), Botryosphaeria dothidea botybirnavirus 1 (BdBRV1), Sclerotinia sclerotiorum botybirnavirus 1 (SsBRV1), and Alternaria botybirnavirus 1 (ABRV1).


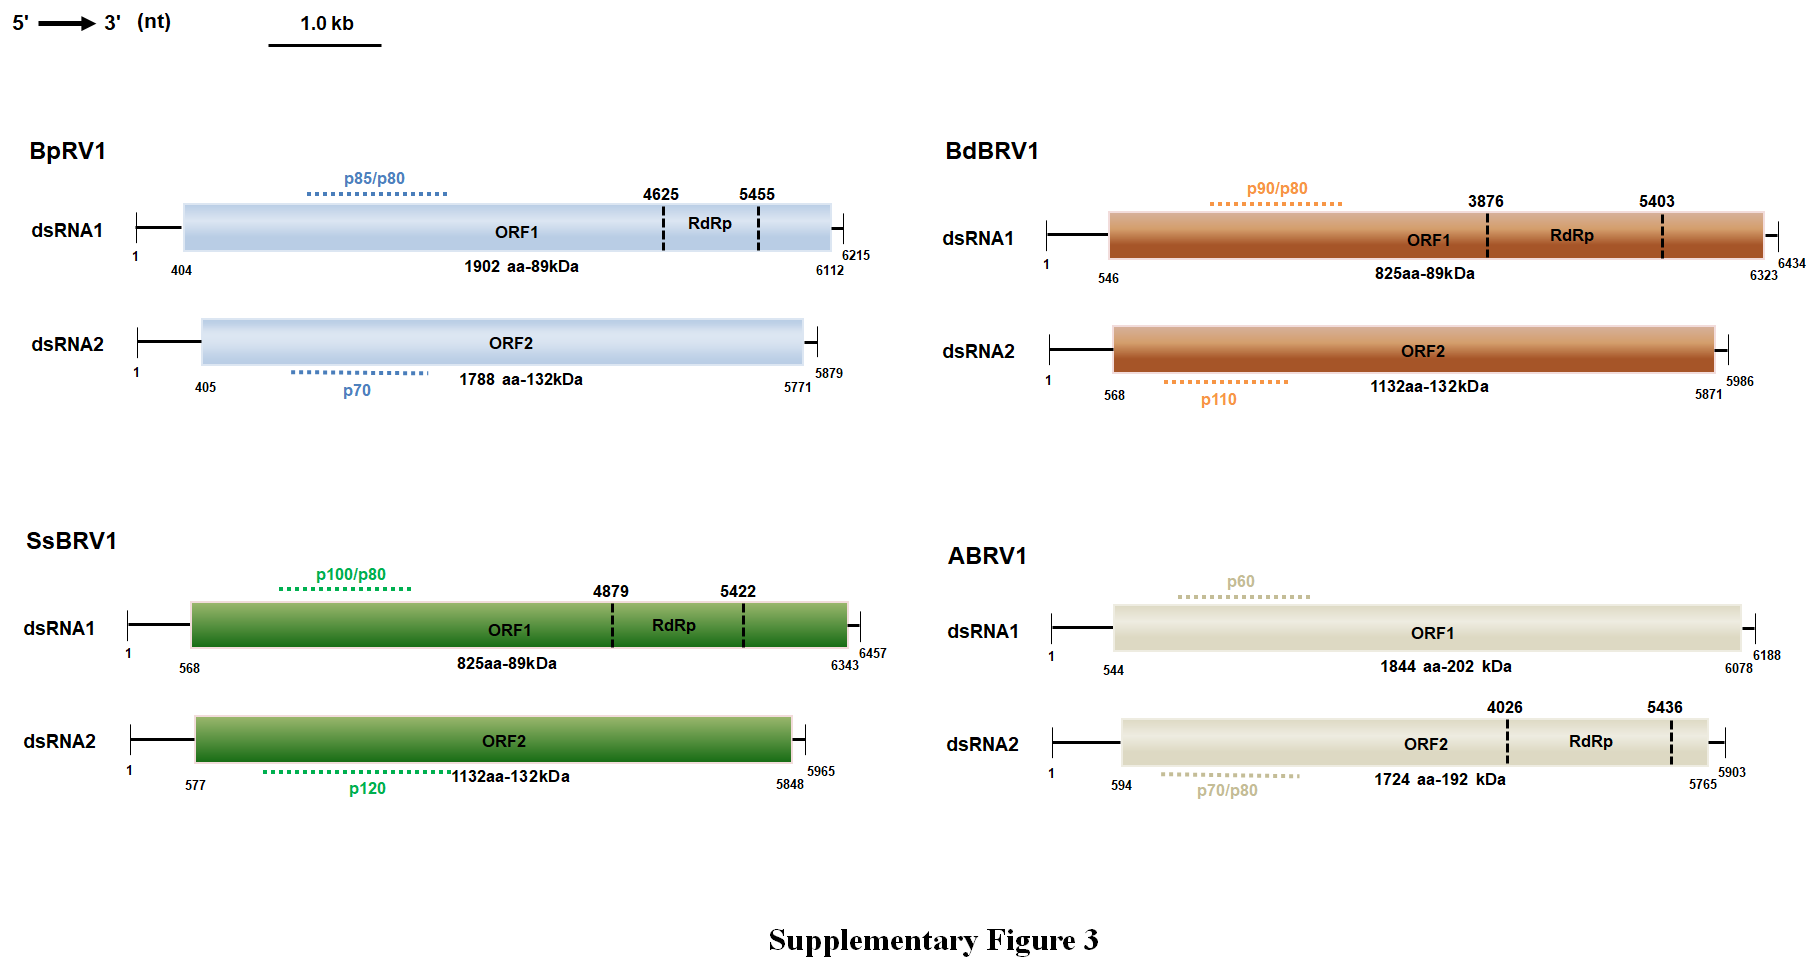

Supplement: Supplementary file 4 [file Manuscript supplementary Figure 3.doc]
